# Supplementary material for: Immune Infiltration-Related ceRNA Network Revealing Potential Biomarkers for Prognosis of Head and Neck Squamous Cell Carcinoma
Source: Hindawi journal article supplement (doi:10.1155/2022/1014347), 2022-09-02
Supplement: f1 [file 1014347.f1.pdf]

**Table S2. Immune scores and stromal scores of HNSCC patients.**

| Sample_title    | ImmuneScore  | StromalScore | IS_group | SS_group |
|-----------------|--------------|--------------|----------|----------|
| TCGA-4P-AA8J-01 | 744.9118096  | -24.60699006 | -IS_low  | -SS_high |
| TCGA-BA-4074-01 | 2387.052646  | 1540.9361    | -IS_high | -SS_high |
| TCGA-BA-4076-01 | 219.6101738  | -306.5797652 | -IS_low  | -SS_high |
| TCGA-BA-4078-01 | 913.6892665  | -977.7040807 | -IS_high | -SS_low  |
| TCGA-BA-5151-01 | 54.24710438  | 118.5839469  | -IS_low  | -SS_high |
| TCGA-BA-5152-01 | 789.5218531  | -94.20821946 | -IS_low  | -SS_high |
| TCGA-BA-5153-01 | 722.8795049  | -326.2851405 | -IS_low  | -SS_low  |
| TCGA-BA-5555-01 | 1423.953214  | -49.76812733 | -IS_high | -SS_high |
| TCGA-BA-5556-01 | -136.7746337 | -997.0456213 | -IS_low  | -SS_low  |
| TCGA-BA-5558-01 | 45.69790162  | 772.9578421  | -IS_low  | -SS_high |
| TCGA-BA-6868-01 | 303.9798985  | 631.6020056  | -IS_low  | -SS_high |
| TCGA-BA-6869-01 | 2207.949626  | -168.5787161 | -IS_high | -SS_high |
| TCGA-BA-6870-01 | -8.492410359 | -1311.462322 | -IS_low  | -SS_low  |
| TCGA-BA-6872-01 | 563.7456843  | 81.76975275  | -IS_low  | -SS_high |
| TCGA-BA-6873-01 | -632.4789314 | -1201.970758 | -IS_low  | -SS_low  |
| TCGA-BA-7269-01 | 1900.47078   | 864.4764062  | -IS_high | -SS_high |
| TCGA-BA-A4IF-01 | 309.481085   | -1319.94043  | -IS_low  | -SS_low  |
| TCGA-BA-A4IH-01 | 1968.101986  | -31.67107765 | -IS_high | -SS_high |
| TCGA-BA-A6D8-01 | 483.7147923  | -60.15055796 | -IS_low  | -SS_high |
| TCGA-BA-A6DA-01 | 2167.184398  | 398.3446259  | -IS_high | -SS_high |
| TCGA-BA-A6DB-01 | -165.2253223 | -1841.251049 | -IS_low  | -SS_low  |
| TCGA-BA-A6DD-01 | 973.4608963  | 389.8303988  | -IS_high | -SS_high |
| TCGA-BA-A6DE-01 | -16.17605189 | -923.9518268 | -IS_low  | -SS_low  |
| TCGA-BA-A6DG-01 | -277.1008989 | -1430.022612 | -IS_low  | -SS_low  |
| TCGA-BA-A6DI-01 | 745.2437512  | -125.6409253 | -IS_low  | -SS_high |
| TCGA-BA-A6DJ-01 | 509.8911605  | -1234.296429 | -IS_low  | -SS_low  |
| TCGA-BA-A6DL-01 | -445.5151318 | -1917.586777 | -IS_low  | -SS_low  |
| TCGA-BA-A8YP-01 | 1803.74201   | 602.638002   | -IS_high | -SS_high |
| TCGA-BB-4217-01 | 1173.8435    | 42.9840528   | -IS_high | -SS_high |
| TCGA-BB-4223-01 | 427.346669   | -608.0295551 | -IS_low  | -SS_low  |
| TCGA-BB-4224-01 | 2375.47192   | 1213.533626  | -IS_high | -SS_high |
| TCGA-BB-4225-01 | 1906.748399  | 304.0557585  | -IS_high | -SS_high |
| TCGA-BB-4227-01 | 323.4847228  | -420.1796974 | -IS_low  | -SS_low  |
| TCGA-BB-4228-01 | -114.8951257 | -966.2547063 | -IS_low  | -SS_low  |
| TCGA-BB-8596-01 | 880.4821528  | 158.0847736  | -IS_high | -SS_high |
| TCGA-BB-8601-01 | 2209.091918  | -676.0665343 | -IS_high | -SS_low  |
| TCGA-BB-A5HY-01 | 502.3910241  | 255.3527596  | -IS_low  | -SS_high |
| TCGA-BB-A5HZ-01 | 1163.549786  | -720.0439208 | -IS_high | -SS_low  |
| TCGA-BB-A6UO-01 | 40.00965397  | -1200.211517 | -IS_low  | -SS_low  |
| TCGA-C9-A47Z-01 | 984.4363696  | -602.9953427 | -IS_high | -SS_low  |
| TCGA-C9-A480-01 | -324.3719876 | -1573.210957 | -IS_low  | -SS_low  |
| TCGA-CN-4722-01 | 794.008451   | -244.7600739 | -IS_low  | -SS_high |

|                 |              |              |          |          |
|-----------------|--------------|--------------|----------|----------|
| TCGA-CN-4723-01 | 549.2002444  | -506.7237226 | -IS_low  | -SS_low  |
| TCGA-CN-4725-01 | 361.2106576  | -1362.502784 | -IS_low  | -SS_low  |
| TCGA-CN-4726-01 | -142.0527279 | -522.6364674 | -IS_low  | -SS_low  |
| TCGA-CN-4728-01 | -172.2499406 | -1026.86749  | -IS_low  | -SS_low  |
| TCGA-CN-4729-01 | 714.1543597  | 214.4229802  | -IS_low  | -SS_high |
| TCGA-CN-4730-01 | 690.9668792  | 92.73881341  | -IS_low  | -SS_high |
| TCGA-CN-4731-01 | 1685.730012  | 1229.830536  | -IS_high | -SS_high |
| TCGA-CN-4733-01 | 1628.729516  | -404.3176755 | -IS_high | -SS_low  |
| TCGA-CN-4735-01 | 1385.867934  | 150.9830225  | -IS_high | -SS_high |
| TCGA-CN-4736-01 | 677.8265781  | -89.96328481 | -IS_low  | -SS_high |
| TCGA-CN-4737-01 | 1991.166067  | 1503.96036   | -IS_high | -SS_high |
| TCGA-CN-4738-01 | 2381.99338   | -40.00623828 | -IS_high | -SS_high |
| TCGA-CN-4739-01 | 1109.488364  | -494.3671943 | -IS_high | -SS_low  |
| TCGA-CN-4740-01 | 745.0531287  | -810.3357888 | -IS_low  | -SS_low  |
| TCGA-CN-4741-01 | 108.1719107  | -1164.594043 | -IS_low  | -SS_low  |
| TCGA-CN-4742-01 | 429.7420478  | -518.3149048 | -IS_low  | -SS_low  |
| TCGA-CN-5355-01 | 441.5982616  | 357.3822048  | -IS_low  | -SS_high |
| TCGA-CN-5356-01 | 89.41347631  | -529.2140499 | -IS_low  | -SS_low  |
| TCGA-CN-5358-01 | 936.2783089  | -619.1548355 | -IS_high | -SS_low  |
| TCGA-CN-5359-01 | 2386.876639  | 1083.970263  | -IS_high | -SS_high |
| TCGA-CN-5360-01 | -621.3320327 | -411.1202633 | -IS_low  | -SS_low  |
| TCGA-CN-5361-01 | 180.7657201  | -1404.9557   | -IS_low  | -SS_low  |
| TCGA-CN-5363-01 | 1076.826634  | 985.1463231  | -IS_high | -SS_high |
| TCGA-CN-5364-01 | 474.6159646  | -960.9649297 | -IS_low  | -SS_low  |
| TCGA-CN-5365-01 | 1126.655029  | 1154.873098  | -IS_high | -SS_high |
| TCGA-CN-5366-01 | 725.0364963  | -937.1518351 | -IS_low  | -SS_low  |
| TCGA-CN-5367-01 | 1048.104826  | -686.3250821 | -IS_high | -SS_low  |
| TCGA-CN-5369-01 | 1971.12212   | 1624.026865  | -IS_high | -SS_high |
| TCGA-CN-5370-01 | 1088.097386  | 1471.200956  | -IS_high | -SS_high |
| TCGA-CN-5373-01 | 1157.356139  | -137.9358259 | -IS_high | -SS_high |
| TCGA-CN-5374-01 | 1896.611628  | -818.4205649 | -IS_high | -SS_low  |
| TCGA-CN-6010-01 | -117.7941699 | -499.6049782 | -IS_low  | -SS_low  |
| TCGA-CN-6011-01 | 468.3922499  | -282.3539619 | -IS_low  | -SS_high |
| TCGA-CN-6012-01 | 1827.068059  | -817.5842497 | -IS_high | -SS_low  |
| TCGA-CN-6013-01 | 421.784925   | 75.99868009  | -IS_low  | -SS_high |
| TCGA-CN-6016-01 | 932.5001487  | -669.3720578 | -IS_high | -SS_low  |
| TCGA-CN-6017-01 | -295.3917505 | -958.4419988 | -IS_low  | -SS_low  |
| TCGA-CN-6018-01 | 29.72019811  | -197.7598744 | -IS_low  | -SS_high |
| TCGA-CN-6019-01 | -57.00281378 | -1335.15406  | -IS_low  | -SS_low  |
| TCGA-CN-6020-01 | 1067.131987  | -215.9360876 | -IS_high | -SS_high |
| TCGA-CN-6021-01 | 1686.240589  | -304.914487  | -IS_high | -SS_high |
| TCGA-CN-6022-01 | 2496.847106  | 1438.230113  | -IS_high | -SS_high |
| TCGA-CN-6023-01 | 1252.513904  | 273.7742764  | -IS_high | -SS_high |
| TCGA-CN-6024-01 | 358.6848007  | 28.97575203  | -IS_low  | -SS_high |

|                 |              |              |          |          |
|-----------------|--------------|--------------|----------|----------|
| TCGA-CN-6988-01 | -170.6987239 | 523.3840682  | -IS_low  | -SS_high |
| TCGA-CN-6989-01 | 2033.287955  | 883.2277751  | -IS_high | -SS_high |
| TCGA-CN-6994-01 | 516.5376539  | -252.4993084 | -IS_low  | -SS_high |
| TCGA-CN-6995-01 | 777.0064926  | -451.5949964 | -IS_low  | -SS_low  |
| TCGA-CN-6996-01 | 796.8891079  | -322.5847111 | -IS_low  | -SS_low  |
| TCGA-CN-6998-01 | 862.0024098  | -917.7971052 | -IS_low  | -SS_low  |
| TCGA-CN-A497-01 | 66.03861171  | -1761.08467  | -IS_low  | -SS_low  |
| TCGA-CN-A498-01 | 796.958788   | -1233.176273 | -IS_low  | -SS_low  |
| TCGA-CN-A499-01 | 686.8345599  | -1000.5279   | -IS_low  | -SS_low  |
| TCGA-CN-A49A-01 | 1874.052421  | -41.43169641 | -IS_high | -SS_high |
| TCGA-CN-A49B-01 | 1797.880036  | 220.1696919  | -IS_high | -SS_high |
| TCGA-CN-A49C-01 | 1339.646398  | 555.951197   | -IS_high | -SS_high |
| TCGA-CN-A63T-01 | 93.43189665  | -1510.066528 | -IS_low  | -SS_low  |
| TCGA-CN-A63U-01 | 1657.833967  | -632.1689796 | -IS_high | -SS_low  |
| TCGA-CN-A63V-01 | 814.0945183  | -464.1896294 | -IS_low  | -SS_low  |
| TCGA-CN-A63W-01 | 538.9582123  | 321.0012018  | -IS_low  | -SS_high |
| TCGA-CN-A641-01 | 1185.667689  | -279.4608219 | -IS_high | -SS_high |
| TCGA-CN-A642-01 | 1941.630758  | -104.2687392 | -IS_high | -SS_high |
| TCGA-CN-A6UY-01 | 1410.128698  | -947.8948364 | -IS_high | -SS_low  |
| TCGA-CN-A6V6-01 | 2801.345211  | 1989.277545  | -IS_high | -SS_high |
| TCGA-CN-A6V7-01 | 2102.51843   | 297.4724907  | -IS_high | -SS_high |
| TCGA-CQ-5324-01 | 158.022892   | -1029.98967  | -IS_low  | -SS_low  |
| TCGA-CQ-5325-01 | 393.792842   | -1790.78973  | -IS_low  | -SS_low  |
| TCGA-CQ-5326-01 | -171.4539323 | -864.515702  | -IS_low  | -SS_low  |
| TCGA-CQ-5327-01 | -416.0391445 | -1021.251179 | -IS_low  | -SS_low  |
| TCGA-CQ-5329-01 | -438.2900623 | -2062.808319 | -IS_low  | -SS_low  |
| TCGA-CQ-5330-01 | 358.4491134  | -441.2238908 | -IS_low  | -SS_low  |
| TCGA-CQ-5331-01 | 1941.90025   | 1582.12723   | -IS_high | -SS_high |
| TCGA-CQ-5332-01 | 2157.908622  | -645.889057  | -IS_high | -SS_low  |
| TCGA-CQ-5333-01 | 1808.314498  | 773.7767762  | -IS_high | -SS_high |
| TCGA-CQ-5334-01 | 782.0423415  | 426.8951366  | -IS_low  | -SS_high |
| TCGA-CQ-6218-01 | 508.8822484  | -624.1041301 | -IS_low  | -SS_low  |
| TCGA-CQ-6219-01 | 1101.625373  | 9.592691395  | -IS_high | -SS_high |
| TCGA-CQ-6220-01 | 2389.197087  | 798.297356   | -IS_high | -SS_high |
| TCGA-CQ-6222-01 | -383.2934947 | -707.738409  | -IS_low  | -SS_low  |
| TCGA-CQ-6223-01 | -252.1441184 | -520.2847169 | -IS_low  | -SS_low  |
| TCGA-CQ-6224-01 | 1424.745613  | -58.02638354 | -IS_high | -SS_high |
| TCGA-CQ-6225-01 | 256.9147021  | -524.3459632 | -IS_low  | -SS_low  |
| TCGA-CQ-6227-01 | 119.9334457  | -1269.288956 | -IS_low  | -SS_low  |
| TCGA-CQ-6228-01 | 2735.002705  | 1226.223236  | -IS_high | -SS_high |
| TCGA-CQ-6229-01 | 1518.280567  | -202.1759217 | -IS_high | -SS_high |
| TCGA-CQ-7065-01 | 247.4966869  | -1633.396862 | -IS_low  | -SS_low  |
| TCGA-CQ-7069-01 | -114.9031524 | -751.2147056 | -IS_low  | -SS_low  |
| TCGA-CQ-7071-01 | -114.032807  | -1092.142088 | -IS_low  | -SS_low  |

|                 |              |              |          |          |
|-----------------|--------------|--------------|----------|----------|
| TCGA-CQ-7072-01 | 780.0197917  | -171.529473  | -IS_low  | -SS_high |
| TCGA-CQ-A4C6-01 | 1747.49596   | -957.172975  | -IS_high | -SS_low  |
| TCGA-CQ-A4C9-01 | 639.8389824  | 491.2561138  | -IS_low  | -SS_high |
| TCGA-CQ-A4CA-01 | 263.5477352  | -2092.213103 | -IS_low  | -SS_low  |
| TCGA-CQ-A4CB-01 | -620.6941585 | -195.4192986 | -IS_low  | -SS_high |
| TCGA-CQ-A4CD-01 | 483.9330636  | -1093.767719 | -IS_low  | -SS_low  |
| TCGA-CQ-A4CE-01 | -1088.391009 | -1959.356159 | -IS_low  | -SS_low  |
| TCGA-CQ-A4CG-01 | 2177.383549  | 763.8700779  | -IS_high | -SS_high |
| TCGA-CQ-A4CH-01 | -631.8872883 | -1543.567025 | -IS_low  | -SS_low  |
| TCGA-CQ-A4CI-01 | 1343.934296  | -1280.165934 | -IS_high | -SS_low  |
| TCGA-CR-5243-01 | 687.8406979  | 728.4858014  | -IS_low  | -SS_high |
| TCGA-CR-5247-01 | 1389.221973  | 30.26028375  | -IS_high | -SS_high |
| TCGA-CR-5248-01 | 286.0185012  | -932.0340517 | -IS_low  | -SS_low  |
| TCGA-CR-5249-01 | 592.6283382  | -410.5703712 | -IS_low  | -SS_low  |
| TCGA-CR-5250-01 | 179.8651411  | -1128.322418 | -IS_low  | -SS_low  |
| TCGA-CR-6467-01 | 669.9783811  | -893.0934135 | -IS_low  | -SS_low  |
| TCGA-CR-6470-01 | 212.2759522  | 241.6176371  | -IS_low  | -SS_high |
| TCGA-CR-6471-01 | 253.0885617  | -259.6162283 | -IS_low  | -SS_high |
| TCGA-CR-6473-01 | 960.12555    | -1017.674769 | -IS_high | -SS_low  |
| TCGA-CR-6474-01 | 2077.039583  | 929.0174918  | -IS_high | -SS_high |
| TCGA-CR-6477-01 | -150.4200056 | -85.53656467 | -IS_low  | -SS_high |
| TCGA-CR-6480-01 | 2801.351255  | 678.8441023  | -IS_high | -SS_high |
| TCGA-CR-6481-01 | 1405.863134  | 741.4797711  | -IS_high | -SS_high |
| TCGA-CR-6482-01 | 1633.837006  | 143.4543126  | -IS_high | -SS_high |
| TCGA-CR-6484-01 | 1294.082148  | -1649.970354 | -IS_high | -SS_low  |
| TCGA-CR-6487-01 | 1209.101583  | -430.3161627 | -IS_high | -SS_low  |
| TCGA-CR-6488-01 | 403.6400947  | -230.3038183 | -IS_low  | -SS_high |
| TCGA-CR-6491-01 | 2020.171998  | -914.8453979 | -IS_high | -SS_low  |
| TCGA-CR-6492-01 | 1606.521159  | 220.6440941  | -IS_high | -SS_high |
| TCGA-CR-6493-01 | 273.9487853  | 156.2720119  | -IS_low  | -SS_high |
| TCGA-CR-7364-01 | 1532.374212  | -421.9013814 | -IS_high | -SS_low  |
| TCGA-CR-7365-01 | 1624.935429  | -798.9449158 | -IS_high | -SS_low  |
| TCGA-CR-7367-01 | 1775.923629  | -1178.433569 | -IS_high | -SS_low  |
| TCGA-CR-7368-01 | 409.6609342  | -640.4401745 | -IS_low  | -SS_low  |
| TCGA-CR-7369-01 | 1114.446652  | -658.259197  | -IS_high | -SS_low  |
| TCGA-CR-7370-01 | -423.8389109 | -1624.009422 | -IS_low  | -SS_low  |
| TCGA-CR-7371-01 | 1437.939677  | -1085.784864 | -IS_high | -SS_low  |
| TCGA-CR-7372-01 | 1778.685231  | 1670.553176  | -IS_high | -SS_high |
| TCGA-CR-7373-01 | 1320.156269  | 1068.549102  | -IS_high | -SS_high |
| TCGA-CR-7374-01 | 779.8723218  | -688.6911207 | -IS_low  | -SS_low  |
| TCGA-CR-7376-01 | 1259.257679  | 456.6499458  | -IS_high | -SS_high |
| TCGA-CR-7377-01 | -161.7963581 | -1291.441473 | -IS_low  | -SS_low  |
| TCGA-CR-7379-01 | 111.9162778  | -1492.619046 | -IS_low  | -SS_low  |
| TCGA-CR-7380-01 | 611.3956034  | -1478.57981  | -IS_low  | -SS_low  |

|                 |              |              |          |          |
|-----------------|--------------|--------------|----------|----------|
| TCGA-CR-7382-01 | 2529.555589  | 831.4513266  | -IS_high | -SS_high |
| TCGA-CR-7383-01 | 821.0677558  | -528.5441948 | -IS_low  | -SS_low  |
| TCGA-CR-7385-01 | 610.804118   | -20.34581245 | -IS_low  | -SS_high |
| TCGA-CR-7386-01 | 2259.722168  | -722.2235625 | -IS_high | -SS_low  |
| TCGA-CR-7388-01 | 996.5670256  | 122.640974   | -IS_high | -SS_high |
| TCGA-CR-7389-01 | 1048.448193  | -76.83607404 | -IS_high | -SS_high |
| TCGA-CR-7390-01 | 387.5731974  | -1075.917039 | -IS_low  | -SS_low  |
| TCGA-CR-7391-01 | 282.6589298  | -1053.329005 | -IS_low  | -SS_low  |
| TCGA-CR-7392-01 | 429.6338542  | -745.7500832 | -IS_low  | -SS_low  |
| TCGA-CR-7393-01 | -298.3127103 | -1462.428676 | -IS_low  | -SS_low  |
| TCGA-CR-7394-01 | 1218.992911  | 301.6017574  | -IS_high | -SS_high |
| TCGA-CR-7395-01 | 1106.34564   | -219.4669129 | -IS_high | -SS_high |
| TCGA-CR-7397-01 | 1321.839239  | 221.2112468  | -IS_high | -SS_high |
| TCGA-CR-7398-01 | 1983.636398  | 731.7535493  | -IS_high | -SS_high |
| TCGA-CR-7399-01 | 245.6979961  | -1184.698719 | -IS_low  | -SS_low  |
| TCGA-CR-7401-01 | 27.16971244  | -253.3755352 | -IS_low  | -SS_high |
| TCGA-CR-7402-01 | 1276.279379  | 853.6893861  | -IS_high | -SS_high |
| TCGA-CR-7404-01 | 845.6755349  | 505.871106   | -IS_low  | -SS_high |
| TCGA-CV-5430-01 | 702.2112273  | -1023.056232 | -IS_low  | -SS_low  |
| TCGA-CV-5431-01 | 2287.771334  | -416.8117299 | -IS_high | -SS_low  |
| TCGA-CV-5432-01 | 2090.334055  | -281.1949895 | -IS_high | -SS_high |
| TCGA-CV-5434-01 | 955.7720672  | 369.1186707  | -IS_high | -SS_high |
| TCGA-CV-5435-01 | 779.406668   | -728.8059869 | -IS_low  | -SS_low  |
| TCGA-CV-5436-01 | 923.670753   | -1099.119366 | -IS_high | -SS_low  |
| TCGA-CV-5439-01 | 1122.321125  | 340.1679281  | -IS_high | -SS_high |
| TCGA-CV-5440-01 | 2150.004258  | 1253.350164  | -IS_high | -SS_high |
| TCGA-CV-5441-01 | 1695.46972   | -519.5396802 | -IS_high | -SS_low  |
| TCGA-CV-5442-01 | 1846.333696  | -461.344913  | -IS_high | -SS_low  |
| TCGA-CV-5443-01 | 1388.433774  | -811.9160276 | -IS_high | -SS_low  |
| TCGA-CV-5444-01 | 115.5867277  | -1190.244995 | -IS_low  | -SS_low  |
| TCGA-CV-5966-01 | 379.3475758  | 299.1745637  | -IS_low  | -SS_high |
| TCGA-CV-5970-01 | 2774.799962  | 258.4175908  | -IS_high | -SS_high |
| TCGA-CV-5971-01 | 1383.693156  | -148.4458143 | -IS_high | -SS_high |
| TCGA-CV-5973-01 | 158.2001075  | 185.801649   | -IS_low  | -SS_high |
| TCGA-CV-5976-01 | 2490.589004  | 325.1093585  | -IS_high | -SS_high |
| TCGA-CV-5977-01 | 1421.453849  | -480.9277893 | -IS_high | -SS_low  |
| TCGA-CV-5978-01 | -319.4339771 | -1204.357025 | -IS_low  | -SS_low  |
| TCGA-CV-5979-01 | 694.8113764  | -695.7518983 | -IS_low  | -SS_low  |
| TCGA-CV-6003-01 | 1846.311795  | -1419.538995 | -IS_high | -SS_low  |
| TCGA-CV-6433-01 | -103.2290733 | -1293.3882   | -IS_low  | -SS_low  |
| TCGA-CV-6436-01 | -473.8814658 | -1785.713498 | -IS_low  | -SS_low  |
| TCGA-CV-6441-01 | 993.2547468  | -1088.948056 | -IS_high | -SS_low  |
| TCGA-CV-6933-01 | 2620.140157  | 1762.468421  | -IS_high | -SS_high |
| TCGA-CV-6934-01 | 1164.657499  | -273.719291  | -IS_high | -SS_high |

|                 |              |              |          |          |
|-----------------|--------------|--------------|----------|----------|
| TCGA-CV-6935-01 | -338.8392735 | -1376.647553 | -IS_low  | -SS_low  |
| TCGA-CV-6936-01 | 481.4671113  | -360.3138425 | -IS_low  | -SS_low  |
| TCGA-CV-6937-01 | 391.5369391  | 646.9698363  | -IS_low  | -SS_high |
| TCGA-CV-6938-01 | 1742.479888  | 302.658903   | -IS_high | -SS_high |
| TCGA-CV-6939-01 | 569.2153467  | -673.5232336 | -IS_low  | -SS_low  |
| TCGA-CV-6940-01 | 2123.513093  | -167.1044566 | -IS_high | -SS_high |
| TCGA-CV-6941-01 | 621.6700364  | -287.0350701 | -IS_low  | -SS_high |
| TCGA-CV-6942-01 | 375.7592319  | -1327.902359 | -IS_low  | -SS_low  |
| TCGA-CV-6943-01 | 362.8227273  | -357.1239401 | -IS_low  | -SS_low  |
| TCGA-CV-6945-01 | 1821.886844  | -532.7558216 | -IS_high | -SS_low  |
| TCGA-CV-6948-01 | 150.6130039  | -1090.879815 | -IS_low  | -SS_low  |
| TCGA-CV-6950-01 | 1970.399469  | 1017.630338  | -IS_high | -SS_high |
| TCGA-CV-6951-01 | 1314.982982  | -720.6655841 | -IS_high | -SS_low  |
| TCGA-CV-6952-01 | -399.6581252 | -1109.934351 | -IS_low  | -SS_low  |
| TCGA-CV-6953-01 | 875.1673054  | -232.1431788 | -IS_low  | -SS_high |
| TCGA-CV-6954-01 | 258.4583505  | -533.3270347 | -IS_low  | -SS_low  |
| TCGA-CV-6955-01 | 2718.754266  | -312.692186  | -IS_high | -SS_low  |
| TCGA-CV-6956-01 | 1982.858916  | -489.4905029 | -IS_high | -SS_low  |
| TCGA-CV-6959-01 | 167.8692856  | -1537.23997  | -IS_low  | -SS_low  |
| TCGA-CV-6960-01 | 220.5694184  | -569.2703462 | -IS_low  | -SS_low  |
| TCGA-CV-6961-01 | 1433.094756  | -357.5047595 | -IS_high | -SS_low  |
| TCGA-CV-6962-01 | 163.8901779  | -1151.664494 | -IS_low  | -SS_low  |
| TCGA-CV-7089-01 | 1127.941354  | -384.8814293 | -IS_high | -SS_low  |
| TCGA-CV-7090-01 | 129.4925441  | -290.3892766 | -IS_low  | -SS_high |
| TCGA-CV-7091-01 | 724.8363103  | 369.0007275  | -IS_low  | -SS_high |
| TCGA-CV-7095-01 | 966.4484134  | -534.5284293 | -IS_high | -SS_low  |
| TCGA-CV-7097-01 | -275.2337066 | -922.8565798 | -IS_low  | -SS_low  |
| TCGA-CV-7099-01 | 2013.165937  | 342.9659784  | -IS_high | -SS_high |
| TCGA-CV-7100-01 | 108.3440559  | -1147.8195   | -IS_low  | -SS_low  |
| TCGA-CV-7101-01 | -246.2196538 | -891.0429018 | -IS_low  | -SS_low  |
| TCGA-CV-7102-01 | 149.4459504  | -993.8968929 | -IS_low  | -SS_low  |
| TCGA-CV-7103-01 | 2115.839987  | 722.727134   | -IS_high | -SS_high |
| TCGA-CV-7104-01 | 1137.749821  | -434.2897939 | -IS_high | -SS_low  |
| TCGA-CV-7177-01 | 1574.954631  | -742.3246103 | -IS_high | -SS_low  |
| TCGA-CV-7178-01 | 102.3756655  | -608.7900429 | -IS_low  | -SS_low  |
| TCGA-CV-7180-01 | 2077.699084  | 44.16605074  | -IS_high | -SS_high |
| TCGA-CV-7183-01 | -510.6785758 | -833.4245679 | -IS_low  | -SS_low  |
| TCGA-CV-7235-01 | 451.0211225  | 21.67594789  | -IS_low  | -SS_high |
| TCGA-CV-7236-01 | 1629.913941  | -251.8025403 | -IS_high | -SS_high |
| TCGA-CV-7238-01 | 2769.279532  | -412.9740928 | -IS_high | -SS_low  |
| TCGA-CV-7242-01 | 1199.183825  | -839.2206295 | -IS_high | -SS_low  |
| TCGA-CV-7245-01 | 1358.06419   | -192.8045636 | -IS_high | -SS_high |
| TCGA-CV-7247-01 | 444.7107743  | 516.9540937  | -IS_low  | -SS_high |
| TCGA-CV-7248-01 | 1904.133055  | -317.3539511 | -IS_high | -SS_low  |

|                 |              |              |          |          |
|-----------------|--------------|--------------|----------|----------|
| TCGA-CV-7250-01 | 1094.544678  | 1203.661209  | -IS_high | -SS_high |
| TCGA-CV-7252-01 | 1072.900516  | -148.2851199 | -IS_high | -SS_high |
| TCGA-CV-7253-01 | 1222.816015  | -280.5966191 | -IS_high | -SS_high |
| TCGA-CV-7254-01 | 477.1263039  | -1600.556696 | -IS_low  | -SS_low  |
| TCGA-CV-7255-01 | -640.0615435 | -1163.099173 | -IS_low  | -SS_low  |
| TCGA-CV-7261-01 | 1358.403684  | 394.4964495  | -IS_high | -SS_high |
| TCGA-CV-7263-01 | -352.6667295 | -1305.69779  | -IS_low  | -SS_low  |
| TCGA-CV-7406-01 | 473.6654638  | -67.62305199 | -IS_low  | -SS_high |
| TCGA-CV-7407-01 | 2476.073069  | -500.6388344 | -IS_high | -SS_low  |
| TCGA-CV-7410-01 | 1310.926045  | -18.50200042 | -IS_high | -SS_high |
| TCGA-CV-7411-01 | -41.96844285 | -472.771874  | -IS_low  | -SS_low  |
| TCGA-CV-7413-01 | 758.8031088  | -1180.555286 | -IS_low  | -SS_low  |
| TCGA-CV-7414-01 | 373.6248051  | -931.6249478 | -IS_low  | -SS_low  |
| TCGA-CV-7415-01 | 99.37812275  | -833.24427   | -IS_low  | -SS_low  |
| TCGA-CV-7416-01 | 591.5357636  | 1270.624428  | -IS_low  | -SS_high |
| TCGA-CV-7418-01 | 855.8716815  | -59.71308458 | -IS_low  | -SS_high |
| TCGA-CV-7421-01 | 2641.279921  | -528.6437472 | -IS_high | -SS_low  |
| TCGA-CV-7422-01 | 1548.232493  | 981.3079972  | -IS_high | -SS_high |
| TCGA-CV-7423-01 | -784.4063006 | -1274.008724 | -IS_low  | -SS_low  |
| TCGA-CV-7424-01 | 118.9773674  | 129.3073724  | -IS_low  | -SS_high |
| TCGA-CV-7425-01 | 1352.500127  | 1026.301889  | -IS_high | -SS_high |
| TCGA-CV-7427-01 | 2033.736331  | 1697.285139  | -IS_high | -SS_high |
| TCGA-CV-7428-01 | 88.33776722  | 216.7742255  | -IS_low  | -SS_high |
| TCGA-CV-7429-01 | 1570.544956  | -281.7901737 | -IS_high | -SS_high |
| TCGA-CV-7430-01 | 522.3206541  | -265.9229886 | -IS_low  | -SS_high |
| TCGA-CV-7432-01 | 1463.716682  | -592.6193796 | -IS_high | -SS_low  |
| TCGA-CV-7433-01 | 816.799795   | 28.60222816  | -IS_low  | -SS_high |
| TCGA-CV-7434-01 | 880.5021267  | -637.1743257 | -IS_high | -SS_low  |
| TCGA-CV-7435-01 | 1304.318538  | 746.1689877  | -IS_high | -SS_high |
| TCGA-CV-7437-01 | 1127.61714   | -80.05925645 | -IS_high | -SS_high |
| TCGA-CV-7438-01 | 291.4271218  | -767.5349831 | -IS_low  | -SS_low  |
| TCGA-CV-7440-01 | 1658.219114  | 259.8360557  | -IS_high | -SS_high |
| TCGA-CV-7446-01 | 1720.940888  | 585.1756168  | -IS_high | -SS_high |
| TCGA-CV-7568-01 | 1745.703679  | -98.57110866 | -IS_high | -SS_high |
| TCGA-CV-A45O-01 | 607.5387981  | -393.3456173 | -IS_low  | -SS_low  |
| TCGA-CV-A45P-01 | 586.2921313  | -98.36729463 | -IS_low  | -SS_high |
| TCGA-CV-A45Q-01 | 72.66241219  | -729.6533143 | -IS_low  | -SS_low  |
| TCGA-CV-A45R-01 | 2248.123177  | 896.7116869  | -IS_high | -SS_high |
| TCGA-CV-A45T-01 | 433.6401223  | -166.2192015 | -IS_low  | -SS_high |
| TCGA-CV-A45U-01 | 323.5902395  | -487.7410987 | -IS_low  | -SS_low  |
| TCGA-CV-A45V-01 | 1277.568648  | -542.5923988 | -IS_high | -SS_low  |
| TCGA-CV-A45W-01 | 866.0948844  | 595.836163   | -IS_low  | -SS_high |
| TCGA-CV-A45X-01 | 1136.003631  | -450.6748896 | -IS_high | -SS_low  |
| TCGA-CV-A45Y-01 | 1001.225687  | 308.0615324  | -IS_high | -SS_high |

|                 |              |              |          |          |
|-----------------|--------------|--------------|----------|----------|
| TCGA-CV-A45Z-01 | 701.9719398  | -339.6609978 | -IS_low  | -SS_low  |
| TCGA-CV-A460-01 | 2714.207734  | 133.8356378  | -IS_high | -SS_high |
| TCGA-CV-A461-01 | 1115.279774  | 389.4523307  | -IS_high | -SS_high |
| TCGA-CV-A463-01 | -712.0979058 | -1309.628909 | -IS_low  | -SS_low  |
| TCGA-CV-A464-01 | 1791.602314  | -225.6026944 | -IS_high | -SS_high |
| TCGA-CV-A465-01 | 374.6728561  | 23.94215236  | -IS_low  | -SS_high |
| TCGA-CV-A468-01 | 58.10777555  | -1258.683171 | -IS_low  | -SS_low  |
| TCGA-CV-A6JD-01 | 2753.547361  | 479.6679864  | -IS_high | -SS_high |
| TCGA-CV-A6JE-01 | 1508.567571  | 587.6261681  | -IS_high | -SS_high |
| TCGA-CV-A6JM-01 | 795.7836508  | -696.6729626 | -IS_low  | -SS_low  |
| TCGA-CV-A6JN-01 | 1901.83497   | -524.4791099 | -IS_high | -SS_low  |
| TCGA-CV-A6JO-01 | 805.8222158  | -78.8990372  | -IS_low  | -SS_high |
| TCGA-CV-A6JT-01 | 1063.577791  | -563.8532724 | -IS_high | -SS_low  |
| TCGA-CV-A6JU-01 | 1175.378521  | 469.8179967  | -IS_high | -SS_high |
| TCGA-CV-A6JY-01 | 1171.745032  | 141.4324075  | -IS_high | -SS_high |
| TCGA-CV-A6JZ-01 | 251.0210956  | -1142.584701 | -IS_low  | -SS_low  |
| TCGA-CV-A6K0-01 | 2420.262089  | -371.1034635 | -IS_high | -SS_low  |
| TCGA-CV-A6K1-01 | 2026.40667   | 551.807057   | -IS_high | -SS_high |
| TCGA-CV-A6K2-01 | 998.9503992  | 22.75924856  | -IS_high | -SS_high |
| TCGA-CX-7085-01 | 1199.418963  | 154.7678128  | -IS_high | -SS_high |
| TCGA-CX-7086-01 | 777.2445194  | -645.8437656 | -IS_low  | -SS_low  |
| TCGA-CX-A4AQ-01 | 154.8262036  | -391.3578131 | -IS_low  | -SS_low  |
| TCGA-D6-6515-01 | 952.1936077  | -557.2166867 | -IS_high | -SS_low  |
| TCGA-D6-6516-01 | 2027.263287  | 1278.67135   | -IS_high | -SS_high |
| TCGA-D6-6517-01 | -406.5892667 | -1616.16073  | -IS_low  | -SS_low  |
| TCGA-D6-6823-01 | 1555.580791  | 563.7450131  | -IS_high | -SS_high |
| TCGA-D6-6824-01 | 2042.04429   | 446.5460714  | -IS_high | -SS_high |
| TCGA-D6-6825-01 | 6.053597796  | -1282.392445 | -IS_low  | -SS_low  |
| TCGA-D6-6826-01 | 91.62077761  | -1085.078175 | -IS_low  | -SS_low  |
| TCGA-D6-6827-01 | 348.0846646  | 222.8918898  | -IS_low  | -SS_high |
| TCGA-D6-8568-01 | 1089.715673  | 983.5521302  | -IS_high | -SS_high |
| TCGA-D6-8569-01 | -648.5402037 | -461.6746384 | -IS_low  | -SS_low  |
| TCGA-D6-A4Z9-01 | 437.117102   | -765.3678322 | -IS_low  | -SS_low  |
| TCGA-D6-A4ZB-01 | -88.36533504 | -1037.039829 | -IS_low  | -SS_low  |
| TCGA-D6-A6EK-01 | 2125.081612  | -753.53875   | -IS_high | -SS_low  |
| TCGA-D6-A6EM-01 | 130.5918193  | 585.3071265  | -IS_low  | -SS_high |
| TCGA-D6-A6EN-01 | 1358.189965  | -260.1088191 | -IS_high | -SS_high |
| TCGA-D6-A6EO-01 | -261.0766402 | -1486.668488 | -IS_low  | -SS_low  |
| TCGA-D6-A6EP-01 | 1330.379874  | -584.665295  | -IS_high | -SS_low  |
| TCGA-D6-A6EQ-01 | 1619.962124  | 660.7789164  | -IS_high | -SS_high |
| TCGA-D6-A6ES-01 | 472.1249007  | 300.7286303  | -IS_low  | -SS_high |
| TCGA-D6-A74Q-01 | -179.1955114 | -1199.108037 | -IS_low  | -SS_low  |
| TCGA-DQ-5624-01 | 238.2412932  | -1294.381019 | -IS_low  | -SS_low  |
| TCGA-DQ-5625-01 | 1528.811261  | 1065.693795  | -IS_high | -SS_high |



|                 |             |              |          |          |
|-----------------|-------------|--------------|----------|----------|
| TCGA-DQ-5630-01 | 1619.168688 | 568.3686989  | -IS_high | -SS_high |
| TCGA-DQ-5631-01 | 449.8203605 | 312.5054027  | -IS_low  | -SS_high |
| TCGA-DQ-7591-01 | 1746.548971 | -797.8455    | -IS_high | -SS_low  |
| TCGA-DQ-7592-01 | 1157.277934 | -890.2988845 | -IS_high | -SS_low  |
| TCGA-F7-7848-01 | 1208.678939 | -244.8269133 | -IS_high | -SS_high |
| TCGA-F7-8298-01 | 2577.688996 | 1264.52808   | -IS_high | -SS_high |
| TCGA-F7-8489-01 | 510.7815202 | -1077.193465 | -IS_low  | -SS_low  |
| TCGA-F7-A50G-01 | 677.2732377 | -800.1962618 | -IS_low  | -SS_low  |
| TCGA-F7-A50I-01 | 2082.8162   | 1173.689226  | -IS_high | -SS_high |
| TCGA-F7-A50J-01 | 2912.765341 | 321.9398881  | -IS_high | -SS_high |
| TCGA-F7-A61S-01 | 9.747991461 | -1128.676263 | -IS_low  | -SS_low  |
| TCGA-F7-A61V-01 | 2250.765573 | 303.5996902  | -IS_high | -SS_high |
| TCGA-F7-A61W-01 | 1670.548045 | -64.66477368 | -IS_high | -SS_high |
| TCGA-F7-A620-01 | 227.7322753 | -1278.493211 | -IS_low  | -SS_low  |
| TCGA-F7-A622-01 | 1233.245192 | -493.0457879 | -IS_high | -SS_low  |
| TCGA-F7-A623-01 | 1939.090634 | -303.0373316 | -IS_high | -SS_high |
| TCGA-F7-A624-01 | 1457.172711 | 797.7021215  | -IS_high | -SS_high |
| TCGA-H7-7774-01 | 1008.728846 | 581.1875714  | -IS_high | -SS_high |
| TCGA-H7-8501-01 | 1318.964607 | 504.383336   | -IS_high | -SS_high |
| TCGA-H7-8502-01 | 1889.512666 | 520.8718314  | -IS_high | -SS_high |
| TCGA-H7-A76A-01 | 1057.662251 | 182.0902495  | -IS_high | -SS_high |
| TCGA-HD-7229-01 | 594.8096059 | -497.0745894 | -IS_low  | -SS_low  |
| TCGA-HD-7753-01 | 1107.14776  | -52.09701606 | -IS_high | -SS_high |
| TCGA-HD-7754-01 | 373.9797684 | -911.6558322 | -IS_low  | -SS_low  |
| TCGA-HD-7831-01 | 643.3034783 | -174.7864872 | -IS_low  | -SS_high |
| TCGA-HD-7832-01 | 1960.037414 | 817.4401629  | -IS_high | -SS_high |
| TCGA-HD-8224-01 | 789.837713  | 475.2491014  | -IS_low  | -SS_high |
| TCGA-HD-8314-01 | 885.2210257 | -811.5039527 | -IS_high | -SS_low  |
| TCGA-HD-A4C1-01 | 1537.254788 | -581.4425604 | -IS_high | -SS_low  |
| TCGA-HD-A633-01 | 1719.944256 | -48.41688777 | -IS_high | -SS_high |
| TCGA-HD-A634-01 | 616.7189066 | 387.6580538  | -IS_low  | -SS_high |
| TCGA-HD-A6HZ-01 | 2827.539861 | 1232.983299  | -IS_high | -SS_high |
| TCGA-HD-A6I0-01 | 442.0334033 | -971.555785  | -IS_low  | -SS_low  |
| TCGA-HL-7533-01 | 1564.052347 | 620.0331263  | -IS_high | -SS_high |
| TCGA-IQ-7630-01 | 409.1819119 | -458.7667087 | -IS_low  | -SS_low  |
| TCGA-IQ-7631-01 | 2089.301349 | 445.7589981  | -IS_high | -SS_high |
| TCGA-IQ-7632-01 | 717.9816149 | -110.0221897 | -IS_low  | -SS_high |
| TCGA-IQ-A61E-01 | 1695.931803 | -397.4736642 | -IS_high | -SS_low  |
| TCGA-IQ-A61G-01 | 1709.681303 | -210.6502271 | -IS_high | -SS_high |
| TCGA-IQ-A61H-01 | 2305.925721 | -25.35563079 | -IS_high | -SS_high |
| TCGA-IQ-A61I-01 | 2014.54727  | -315.1429464 | -IS_high | -SS_low  |
| TCGA-IQ-A61J-01 | 650.7821105 | -717.5908252 | -IS_low  | -SS_low  |
| TCGA-IQ-A61O-01 | 377.2973313 | -38.42645621 | -IS_low  | -SS_high |
| TCGA-IQ-A6SH-01 | 270.2603331 | 57.49912545  | -IS_low  | -SS_high |

|                 |              |              |          |          |
|-----------------|--------------|--------------|----------|----------|
| TCGA-KU-A66S-01 | 746.2775806  | -812.310098  | -IS_low  | -SS_low  |
| TCGA-KU-A66T-01 | 763.6326629  | -615.9379719 | -IS_low  | -SS_low  |
| TCGA-KU-A6H7-01 | 28.23577473  | -111.5813311 | -IS_low  | -SS_high |
| TCGA-KU-A6H8-01 | 1842.663994  | 716.442096   | -IS_high | -SS_high |
| TCGA-MT-A51W-01 | 988.3192583  | -103.3705769 | -IS_high | -SS_high |
| TCGA-MT-A51X-01 | 621.2201145  | -1096.334551 | -IS_low  | -SS_low  |
| TCGA-MT-A67A-01 | 1007.117129  | 419.6506186  | -IS_high | -SS_high |
| TCGA-MT-A67D-01 | 2433.879658  | 141.3073921  | -IS_high | -SS_high |
| TCGA-MT-A67F-01 | 680.4975124  | -169.0003797 | -IS_low  | -SS_high |
| TCGA-MT-A7BN-01 | 1757.062173  | -1174.265582 | -IS_high | -SS_low  |
| TCGA-MZ-A5BI-01 | 697.3083494  | -709.361133  | -IS_low  | -SS_low  |
| TCGA-MZ-A6I9-01 | 1363.904846  | 961.5990074  | -IS_high | -SS_high |
| TCGA-MZ-A7D7-01 | 163.1579463  | -1134.746638 | -IS_low  | -SS_low  |
| TCGA-P3-A5Q5-01 | 951.6390102  | -568.1128395 | -IS_high | -SS_low  |
| TCGA-P3-A5Q6-01 | 1912.765538  | 716.7722086  | -IS_high | -SS_high |
| TCGA-P3-A5QA-01 | 1115.07969   | 2.953307847  | -IS_high | -SS_high |
| TCGA-P3-A5QE-01 | 132.3593086  | -910.9166089 | -IS_low  | -SS_low  |
| TCGA-P3-A5QF-01 | 2388.746816  | 235.5281544  | -IS_high | -SS_high |
| TCGA-P3-A6SW-01 | 1738.538484  | -410.0136712 | -IS_high | -SS_low  |
| TCGA-P3-A6SX-01 | -370.2212874 | -1550.628984 | -IS_low  | -SS_low  |
| TCGA-P3-A6T0-01 | 1354.441418  | -1074.671912 | -IS_high | -SS_low  |
| TCGA-P3-A6T2-01 | 1009.384398  | -221.6964101 | -IS_high | -SS_high |
| TCGA-P3-A6T3-01 | 895.0381739  | -558.8567598 | -IS_high | -SS_low  |
| TCGA-P3-A6T4-01 | 1247.934053  | -476.0307059 | -IS_high | -SS_low  |
| TCGA-P3-A6T5-01 | 609.8327476  | 67.61081033  | -IS_low  | -SS_high |
| TCGA-P3-A6T6-01 | 659.7420964  | -227.355719  | -IS_low  | -SS_high |
| TCGA-P3-A6T7-01 | 1264.011239  | -253.7707579 | -IS_high | -SS_high |
| TCGA-P3-A6T8-01 | 1605.753508  | -450.979511  | -IS_high | -SS_low  |
| TCGA-QK-A64Z-01 | 1841.456411  | 1320.589907  | -IS_high | -SS_high |
| TCGA-QK-A652-01 | 1066.213229  | -154.9937726 | -IS_high | -SS_high |
| TCGA-QK-A6IF-01 | -423.8708449 | -1660.718695 | -IS_low  | -SS_low  |
| TCGA-QK-A6IG-01 | 654.3884904  | -709.0183915 | -IS_low  | -SS_low  |
| TCGA-QK-A6IH-01 | 971.0813171  | -626.3797808 | -IS_high | -SS_low  |
| TCGA-QK-A6II-01 | 1170.272706  | 8.305259855  | -IS_high | -SS_high |
| TCGA-QK-A6IJ-01 | 160.1414389  | -1157.242578 | -IS_low  | -SS_low  |
| TCGA-QK-A6V9-01 | 228.3958571  | -800.8451192 | -IS_low  | -SS_low  |
| TCGA-QK-A6VB-01 | 817.2009809  | -62.04530748 | -IS_low  | -SS_high |
| TCGA-QK-A6VC-01 | 343.610763   | -618.7913988 | -IS_low  | -SS_low  |
| TCGA-QK-A8Z7-01 | 1141.304583  | -602.5390523 | -IS_high | -SS_low  |
| TCGA-QK-A8Z8-01 | 2169.333629  | 178.4620693  | -IS_high | -SS_high |
| TCGA-QK-A8Z9-01 | 712.7781487  | -604.1347254 | -IS_low  | -SS_low  |
| TCGA-QK-A8ZA-01 | -30.62890453 | -572.7112397 | -IS_low  | -SS_low  |
| TCGA-QK-A8ZB-01 | 1676.42843   | -328.5943369 | -IS_high | -SS_low  |
| TCGA-QK-AA3J-01 | 1246.758962  | -264.9118198 | -IS_high | -SS_high |

|                 |              |              |          |          |
|-----------------|--------------|--------------|----------|----------|
| TCGA-QK-AA3K-01 | 1967.838894  | 351.4761616  | -IS_high | -SS_high |
| TCGA-RS-A6TO-01 | 600.5277301  | -430.4604102 | -IS_low  | -SS_low  |
| TCGA-RS-A6TP-01 | 1336.17975   | 1084.796117  | -IS_high | -SS_high |
| TCGA-T2-A6WX-01 | 586.9359042  | 675.7249496  | -IS_low  | -SS_high |
| TCGA-T2-A6WZ-01 | 1050.645762  | -467.6794257 | -IS_high | -SS_low  |
| TCGA-T2-A6X0-01 | 1380.073843  | 1212.380174  | -IS_high | -SS_high |
| TCGA-T2-A6X2-01 | 862.1355331  | 458.4561945  | -IS_low  | -SS_high |
| TCGA-T3-A92M-01 | 1453.249398  | -93.5979839  | -IS_high | -SS_high |
| TCGA-T3-A92N-01 | 2016.471716  | -264.259492  | -IS_high | -SS_high |
| TCGA-TN-A7HI-01 | -182.8025187 | -1056.690578 | -IS_low  | -SS_low  |
| TCGA-TN-A7HJ-01 | 876.7952682  | -868.6027626 | -IS_low  | -SS_low  |
| TCGA-TN-A7HL-01 | 977.3569994  | -98.87723786 | -IS_high | -SS_high |
| TCGA-UF-A718-01 | 1632.046788  | 614.326783   | -IS_high | -SS_high |
| TCGA-UF-A719-01 | -1003.149592 | -1778.731564 | -IS_low  | -SS_low  |
| TCGA-UF-A71A-01 | -455.9380395 | 253.2896626  | -IS_low  | -SS_high |
| TCGA-UF-A71B-01 | 588.7884742  | -609.0200967 | -IS_low  | -SS_low  |
| TCGA-UF-A71E-01 | 202.6224939  | -199.3906642 | -IS_low  | -SS_high |
| TCGA-UF-A7J9-01 | 1430.017512  | -558.5295903 | -IS_high | -SS_low  |
| TCGA-UF-A7JA-01 | -175.6614732 | -168.6623047 | -IS_low  | -SS_high |
| TCGA-UF-A7JC-01 | -12.42309365 | 195.5559082  | -IS_low  | -SS_high |
| TCGA-UF-A7JD-01 | 2284.202739  | 1259.513714  | -IS_high | -SS_high |
| TCGA-UF-A7JF-01 | 1646.101857  | 262.2015317  | -IS_high | -SS_high |
| TCGA-UF-A7JH-01 | 1782.380384  | 466.9131228  | -IS_high | -SS_high |
| TCGA-UF-A7JJ-01 | 1373.131237  | -1033.697443 | -IS_high | -SS_low  |
| TCGA-UF-A7JK-01 | -340.0653815 | -491.416433  | -IS_low  | -SS_low  |
| TCGA-UF-A7JO-01 | 60.44630687  | -611.264205  | -IS_low  | -SS_low  |
| TCGA-UF-A7JS-01 | 432.6475307  | -281.9727811 | -IS_low  | -SS_high |
| TCGA-UF-A7JT-01 | 603.2879718  | -1060.291562 | -IS_low  | -SS_low  |
| TCGA-UP-A6WW-01 | 963.5676045  | -105.9766073 | -IS_high | -SS_high |
| TCGA-WA-A7H4-01 | -91.02108375 | -1251.526894 | -IS_low  | -SS_low  |

---
