# Supplementary material for: Immune Infiltration-Related ceRNA Network Revealing Potential Biomarkers for Prognosis of Head and Neck Squamous Cell Carcinoma
Source: Hindawi journal article supplement (doi:10.1155/2022/1014347), 2022-09-02
Supplement: f2 [file 1014347.f2.pdf]

**Table S1 Clinical characteristic of HNSCC patients.**

| <b>Patients</b> | <b>Age at initial pathologic diagnosis</b> | <b>Gender</b> | <b>Clinical stage</b> | <b>Metastasis</b> | <b>N stage</b> | <b>T stage</b> | <b>Lymph node examined count</b> | <b>Neoplasm histologic grade</b> | <b>Primary therapy outcome success</b> | <b>Targeted molecular therapy</b> | <b>Outcome</b> | <b>Time</b> |
|-----------------|--------------------------------------------|---------------|-----------------------|-------------------|----------------|----------------|----------------------------------|----------------------------------|----------------------------------------|-----------------------------------|----------------|-------------|
| TCGA-4P-AA8J    | 66.0                                       | male          | stage iva             | m0                | n2a            | t4a            | 44.0                             | g2                               | complete remission/response            | no                                | 0              | 102         |
| TCGA-BA-4074    | 69.0                                       | male          | stage iva             | m0                | n2c            | t3             | 47.0                             | g3                               | complete remission/response            | yes                               | 1              | 462         |
| TCGA-BA-4076    | 39.0                                       | male          | stage iva             | m0                | n2c            | t3             | NA                               | g2                               | complete remission/response            | yes                               | 1              | 415         |
| TCGA-BA-4078    | 83.0                                       | male          | stage iva             | m0                | n2a            | t2             | 52.0                             | g2                               | NA                                     | no                                | 1              | 276         |
| TCGA-BA-5151    | 72.0                                       | male          | stage iva             | m0                | n0             | t4a            | 33.0                             | g1                               | complete remission/response            | no                                | 0              | 722         |
| TCGA-BA-5152    | 56.0                                       | male          | stage iva             | m0                | n0             | t4a            | 28.0                             | g2                               | complete remission/response            | no                                | 0              | 1288        |
| TCGA-BA-5153    | 51.0                                       | male          | stage iii             | m0                | n1             | t2             | 0.0                              | g2                               | complete remission/response            | no                                | 1              | 1762        |
| TCGA-BA-5555    | 54.0                                       | male          | stage iva             | m0                | n2c            | t2             | 68.0                             | g2                               | complete remission/response            | no                                | 0              | 520         |
| TCGA-BA-5556    | 58.0                                       | female        | stage ii              | m0                | n0             | t2             | 81.0                             | g3                               | complete remission/response            | no                                | 0              | 725         |

|              |      |        |              |    |     |     |      |    |                                |     |   |          |
|--------------|------|--------|--------------|----|-----|-----|------|----|--------------------------------|-----|---|----------|
| TCGA-BA-5558 | 65.0 | male   | stage<br>iva | m0 | n1  | t4a | 37.0 | g1 | complete<br>remission/response | no  | 0 | 199<br>5 |
| TCGA-BA-6868 | 53.0 | male   | stage<br>ivb | m0 | n3  | t3  | NA   | g2 | partial<br>remission/response  | yes | 1 | 472      |
| TCGA-BA-6869 | 62.0 | male   | stage iii    | m0 | n0  | t3  | 80.0 | g2 | complete<br>remission/response | no  | 0 | 644      |
| TCGA-BA-6870 | 60.0 | female | stage<br>ivc | m1 | n2c | t3  | NA   | g2 | NA                             | yes | 1 | 451      |
| TCGA-BA-6872 | 47.0 | male   | stage<br>iva | m0 | n2c | t3  | 50.0 | g2 | NA                             | yes | 1 | 384      |
| TCGA-BA-6873 | 28.0 | male   | stage<br>iva | m0 | n2b | t2  | 48.0 | g2 | progressive disease            | no  | 0 | 122      |
| TCGA-BA-7269 | 61.0 | male   | stage iii    | m0 | n1  | t2  | 17.0 | g1 | complete<br>remission/response | no  | 0 | 127<br>3 |
| TCGA-BA-A4IF | 59.0 | male   | stage<br>iva | m0 | n0  | t4  | NA   | g2 | complete<br>remission/response | yes | 0 | 895      |
| TCGA-BA-A4IH | 57.0 | male   | stage<br>iva | m0 | n2b | t2  | 39.0 | g3 | complete<br>remission/response | yes | 0 | 622      |
| TCGA-BA-A6D8 | 59.0 | male   | stage<br>iva | m0 | n2c | t4a | 77.0 | g2 | complete<br>remission/response | yes | 0 | 850      |
| TCGA-BA-A6DA | 41.0 | female | stage<br>iva | m0 | n2c | t4a | 87.0 | g2 | complete<br>remission/response | NA  | 0 | 351      |
| TCGA-BA-A6DB | 24.0 | female | stage ii     | m0 | n0  | t2  | 24.0 | g1 | complete<br>remission/response | no  | 0 | 216      |
| TCGA-BA-A6DD | 44.0 | male   | stage<br>iva | m0 | n2c | t4a | 42.0 | g2 | progressive disease            | NA  | 1 | 173      |

|              |      |        |           |    |     |     |       |    |                             |     |   |     |
|--------------|------|--------|-----------|----|-----|-----|-------|----|-----------------------------|-----|---|-----|
| TCGA-BA-A6DE | 70.0 | female | stage iii | m0 | n0  | t3  | 73.0  | g2 | complete remission/response | NA  | 0 | 440 |
| TCGA-BA-A6DG | 49.0 | male   | stage iva | m0 | n2b | t4a | NA    | g2 | progressive disease         | NA  | 1 | 69  |
| TCGA-BA-A6DI | 62.0 | male   | stage iii | m0 | n0  | t3  | NA    | g2 | complete remission/response | NA  | 1 | 336 |
| TCGA-BA-A6DJ | 62.0 | male   | stage iva | m0 | n2b | t4  | 101.0 | g2 | complete remission/response | yes | 1 | 407 |
| TCGA-BA-A6DL | 59.0 | male   | stage iii | m0 | n0  | t3  | NA    | g2 | complete remission/response | yes | 0 | 623 |
| TCGA-BA-A8YP | 50.0 | male   | stage ivb | m0 | n3  | t4  | 66.0  | g2 | complete remission/response | yes | 0 | 499 |
| TCGA-BB-4217 | 68.0 | male   | stage iva | m0 | n2c | t4a | 51.0  | g3 | partial remission/response  | no  | 0 | 187 |
| TCGA-BB-4223 | 48.0 | male   | stage iva | m0 | n2b | t3  | NA    | g3 | complete remission/response | yes | 0 | 322 |
| TCGA-BB-4224 | 52.0 | male   | stage iii | m0 | n0  | t3  | 51.0  | g2 | progressive disease         | no  | 0 | 278 |
| TCGA-BB-4225 | 73.0 | male   | stage iva | m0 | n2c | t3  | NA    | g3 | partial remission/response  | yes | 0 | 146 |
| TCGA-BB-4227 | 66.0 | male   | stage iva | m0 | n2b | t4a | 25.0  | g2 | progressive disease         | no  | 0 | 134 |
| TCGA-BB-4228 | 50.0 | male   | stage ii  | m0 | n0  | t2  | NA    | gx | complete remission/response | no  | 0 | 559 |
| TCGA-BB-8596 | 69.0 | female | stage iva | m0 | n1  | t4  | NA    | g3 | complete remission/response | no  | 0 | 216 |
| TCGA-BB-8601 | 84.0 | male   | stage ii  | m0 | n0  | t2  | 16.0  | g2 | progressive disease         | no  | 0 | 624 |

|              |      |        |              |    |     |     |      |    |                                |     |   |          |
|--------------|------|--------|--------------|----|-----|-----|------|----|--------------------------------|-----|---|----------|
| TCGA-BB-A5HY | 64.0 | male   | stage<br>iva | m0 | n2b | t3  | 24.0 | g3 | complete<br>remission/response | yes | 1 | 321      |
| TCGA-BB-A5HZ | 65.0 | male   | stage<br>iva | m0 | n1  | t4  | 39.0 | g2 | complete<br>remission/response | yes | 0 | 827      |
| TCGA-BB-A6UO | 61.0 | female | stage<br>iva | mx | n2  | t3  | 28.0 | g2 | complete<br>remission/response | NA  | 1 | 268      |
| TCGA-C9-A47Z | 72.0 | female | stage iii    | m0 | n1  | t2  | 2.0  | g1 | complete<br>remission/response | no  | 1 | 191      |
| TCGA-C9-A480 | 45.0 | female | stage iii    | m0 | n0  | t3  | NA   | g1 | complete<br>remission/response | no  | 0 | 386      |
| TCGA-CN-4722 | 61.0 | female | stage ii     | m0 | n0  | t2  | 53.0 | g1 | complete<br>remission/response | no  | 0 | 148<br>3 |
| TCGA-CN-4723 | 67.0 | male   | stage<br>iva | m0 | n0  | t4a | 55.0 | g2 | complete<br>remission/response | no  | 0 | 169<br>9 |
| TCGA-CN-4725 | 60.0 | male   | stage ii     | m0 | n0  | t2  | 16.0 | g2 | complete<br>remission/response | no  | 0 | 115<br>7 |
| TCGA-CN-4726 | 68.0 | male   | stage<br>iva | m0 | n2  | t3  | 14.0 | g2 | progressive disease            | no  | 1 | 142      |
| TCGA-CN-4728 | 56.0 | male   | stage<br>iva | m0 | n2  | t2  | 58.0 | g2 | complete<br>remission/response | yes | 0 | 172<br>4 |
| TCGA-CN-4729 | 73.0 | male   | stage<br>iva | m0 | n0  | t4a | 24.0 | g2 | complete<br>remission/response | no  | 0 | 392      |
| TCGA-CN-4730 | 62.0 | male   | stage<br>iva | m0 | n2b | t4a | 37.0 | g2 | complete<br>remission/response | no  | 0 | 817      |
| TCGA-CN-4731 | 63.0 | female | stage<br>iva | m0 | n2  | t4a | 52.0 | g3 | progressive disease            | no  | 1 | 998      |

|              |      |        |           |    |     |     |      |    |                             |     |   |      |
|--------------|------|--------|-----------|----|-----|-----|------|----|-----------------------------|-----|---|------|
| TCGA-CN-4733 | 61.0 | male   | stage i   | m0 | n0  | t1  | 29.0 | g3 | complete remission/response | no  | 0 | 1586 |
| TCGA-CN-4735 | 52.0 | male   | stage iva | m0 | n2b | t3  | 70.0 | g3 | complete remission/response | yes | 0 | 1737 |
| TCGA-CN-4736 | 70.0 | female | stage ii  | m0 | n0  | t2  | NA   | g2 | complete remission/response | no  | 1 | 395  |
| TCGA-CN-4737 | 19.0 | male   | stage ii  | m0 | n0  | t2  | 36.0 | g2 | complete remission/response | yes | 0 | 625  |
| TCGA-CN-4738 | 53.0 | male   | stage iva | m0 | n0  | t4a | 39.0 | g2 | NA                          | NA  | 1 | 436  |
| TCGA-CN-4739 | 71.0 | male   | stage iva | m0 | n0  | t4a | 54.0 | g2 | complete remission/response | yes | 1 | 1394 |
| TCGA-CN-4740 | 79.0 | female | stage iva | m0 | n0  | t4a | 26.0 | g2 | complete remission/response | no  | 1 | 839  |
| TCGA-CN-4741 | 75.0 | male   | stage iva | m0 | n0  | t4a | 46.0 | g2 | complete remission/response | yes | 0 | 2239 |
| TCGA-CN-4742 | 48.0 | female | stage iva | m0 | n1  | t4a | 49.0 | g3 | progressive disease         | yes | 1 | 397  |
| TCGA-CN-5355 | 64.0 | male   | stage iva | m0 | n0  | t4a | 27.0 | g2 | complete remission/response | no  | 0 | 1278 |
| TCGA-CN-5356 | 56.0 | male   | stage iii | m0 | n0  | t3  | 97.0 | g2 | complete remission/response | no  | 0 | 1409 |
| TCGA-CN-5358 | 60.0 | male   | stage iii | m0 | n1  | t2  | 57.0 | g2 | complete remission/response | no  | 1 | 261  |
| TCGA-CN-5359 | 59.0 | male   | stage iva | m0 | n1  | t4a | 29.0 | g2 | complete remission/response | yes | 1 | 377  |

|              |      |        |              |    |     |     |      |    |                                |     |   |          |
|--------------|------|--------|--------------|----|-----|-----|------|----|--------------------------------|-----|---|----------|
| TCGA-CN-5360 | 68.0 | male   | stage<br>iva | m0 | n0  | t4a | 54.0 | g2 | complete<br>remission/response | yes | 0 | 216<br>9 |
| TCGA-CN-5361 | 80.0 | male   | NA           | NA | nx  | tx  | 56.0 | g2 | complete<br>remission/response | no  | 1 | 212<br>0 |
| TCGA-CN-5363 | 48.0 | male   | stage<br>ivb | m0 | n3  | t4a | 28.0 | g3 | complete<br>remission/response | NA  | 1 | 253      |
| TCGA-CN-5364 | 55.0 | male   | stage<br>iva | m0 | n2c | t4a | 73.0 | g2 | complete<br>remission/response | yes | 1 | 493      |
| TCGA-CN-5365 | 38.0 | male   | stage<br>ivc | m1 | n2  | t1  | 9.0  | g2 | progressive disease            | NA  | 1 | 351      |
| TCGA-CN-5366 | 51.0 | male   | stage<br>iva | m0 | n2c | t4a | 47.0 | g2 | complete<br>remission/response | yes | 1 | 360      |
| TCGA-CN-5367 | 60.0 | female | stage<br>iva | m0 | n0  | t4a | 46.0 | g2 | complete<br>remission/response | yes | 1 | 352      |
| TCGA-CN-5369 | 90.0 | female | stage<br>iva | m0 | n1  | t4a | 82.0 | g3 | complete<br>remission/response | no  | 1 | 380      |
| TCGA-CN-5370 | 78.0 | male   | stage ii     | m0 | n0  | t2  | 40.0 | g3 | complete<br>remission/response | NA  | 1 | 259      |
| TCGA-CN-5373 | 55.0 | female | stage ii     | m0 | n0  | t2  | 30.0 | g1 | complete<br>remission/response | no  | 0 | 158<br>4 |
| TCGA-CN-5374 | 56.0 | female | stage<br>iva | m0 | n2  | t2  | NA   | g3 | complete<br>remission/response | yes | 1 | 173<br>2 |
| TCGA-CN-6010 | 53.0 | male   | stage<br>iva | m0 | n0  | t4a | 39.0 | g2 | complete<br>remission/response | yes | 0 | 152<br>3 |
| TCGA-CN-6011 | 57.0 | male   | stage<br>iva | m0 | n0  | t4a | 44.0 | g3 | complete<br>remission/response | yes | 0 | 933      |

|              |      |        |           |    |     |     |      |    |                             |     |   |      |
|--------------|------|--------|-----------|----|-----|-----|------|----|-----------------------------|-----|---|------|
| TCGA-CN-6012 | 66.0 | male   | stage iii | m0 | n1  | t3  | 35.0 | g2 | complete remission/response | yes | 0 | 1460 |
| TCGA-CN-6013 | 56.0 | male   | stage iva | m0 | n2b | t4a | 28.0 | g3 | complete remission/response | yes | 1 | 727  |
| TCGA-CN-6016 | 64.0 | male   | stage iva | m0 | n1  | t4a | 75.0 | g2 | complete remission/response | yes | 0 | 1443 |
| TCGA-CN-6017 | 55.0 | male   | stage iii | m0 | n1  | t2  | 30.0 | g2 | complete remission/response | yes | 1 | 853  |
| TCGA-CN-6018 | 85.0 | female | stage iva | m0 | n2c | t4a | 20.0 | g2 | complete remission/response | no  | 1 | 580  |
| TCGA-CN-6019 | 61.0 | male   | stage iva | m0 | n0  | t4a | 45.0 | g2 | complete remission/response | yes | 0 | 1038 |
| TCGA-CN-6020 | 58.0 | male   | stage iva | m0 | n2c | t3  | 68.0 | g2 | complete remission/response | no  | 1 | 205  |
| TCGA-CN-6021 | 63.0 | female | stage iii | m0 | n0  | t3  | NA   | g2 | progressive disease         | NA  | 1 | 276  |
| TCGA-CN-6022 | 49.0 | male   | stage iva | m0 | n1  | t4a | 33.0 | g3 | progressive disease         | no  | 1 | 281  |
| TCGA-CN-6023 | 73.0 | male   | stage iva | m0 | n0  | t4a | 31.0 | gx | complete remission/response | yes | 0 | 1584 |
| TCGA-CN-6024 | 66.0 | male   | stage iva | m0 | n2  | t4a | 39.0 | g2 | progressive disease         | NA  | 1 | 337  |
| TCGA-CN-6988 | 47.0 | male   | stage iva | m0 | n2b | t4a | 81.0 | g3 | complete remission/response | NA  | 0 | 318  |
| TCGA-CN-6989 | 64.0 | male   | stage iva | m0 | n2b | t3  | 56.0 | g2 | complete remission/response | yes | 1 | 980  |
| TCGA-CN-6994 | 67.0 | male   | stage     | m0 | n2b | t4a | 37.0 | g2 | complete                    | no  | 0 | 118  |

|              |      |        |              |    |     |     |      |    |                                |     |   |          |
|--------------|------|--------|--------------|----|-----|-----|------|----|--------------------------------|-----|---|----------|
|              |      |        | iva          |    |     |     |      |    | remission/response             |     |   | 3        |
| TCGA-CN-6995 | 78.0 | male   | stage<br>iva | m0 | n1  | t4a | 51.0 | g2 | complete<br>remission/response | no  | 1 | 112      |
| TCGA-CN-6996 | 58.0 | female | stage<br>iva | m0 | n2b | t3  | 24.0 | g2 | progressive disease            | yes | 1 | 530      |
| TCGA-CN-6998 | 53.0 | male   | stage<br>iva | m0 | n1  | t4a | 26.0 | g2 | progressive disease            | yes | 1 | 357      |
| TCGA-CN-A497 | 63.0 | male   | stage<br>iva | m0 | n2c | t2  | 69.0 | g2 | complete<br>remission/response | no  | 0 | 106<br>5 |
| TCGA-CN-A498 | 61.0 | female | stage ii     | m0 | n0  | t2  | 23.0 | g1 | complete<br>remission/response | yes | 1 | 773      |
| TCGA-CN-A499 | 60.0 | female | stage i      | m0 | n0  | t1  | 37.0 | g2 | complete<br>remission/response | no  | 0 | 717      |
| TCGA-CN-A49A | 60.0 | male   | stage<br>iva | m0 | n0  | t4a | 59.0 | g2 | complete<br>remission/response | yes | 1 | 526      |
| TCGA-CN-A49B | 71.0 | male   | stage iii    | m0 | n1  | t3  | 39.0 | g3 | complete<br>remission/response | no  | 0 | 904      |
| TCGA-CN-A49C | 67.0 | male   | stage<br>iva | m0 | n2b | t4a | NA   | gx | complete<br>remission/response | yes | 0 | 645      |
| TCGA-CN-A63T | 60.0 | male   | stage<br>iva | m0 | n2b | t3  | 80.0 | g3 | complete<br>remission/response | yes | 0 | 225      |
| TCGA-CN-A63U | 50.0 | male   | stage iii    | m0 | n0  | t3  | 45.0 | g3 | complete<br>remission/response | no  | 0 | 964      |
| TCGA-CN-A63V | 59.0 | male   | stage<br>iva | m0 | n0  | t4  | 45.0 | g2 | complete<br>remission/response | no  | 0 | 679      |
| TCGA-CN-A63W | 48.0 | female | stage        | m0 | n2c | t4a | 66.0 | g2 | complete                       | yes | 1 | 377      |



|              |      |        |                     |    |     |     |       |    |                                                      |     |   |          |
|--------------|------|--------|---------------------|----|-----|-----|-------|----|------------------------------------------------------|-----|---|----------|
| TCGA-CN-A641 | 47.0 | male   | iva<br>stage<br>iva | m0 | n2c | t4  | 70.0  | g2 | remission/response<br>complete<br>remission/response | yes | 0 | 367      |
| TCGA-CN-A642 | 57.0 | male   | stage<br>iva        | m0 | n2c | t3  | 110.0 | g3 | progressive disease                                  | no  | 1 | 82       |
| TCGA-CN-A6UY | 57.0 | male   | stage<br>iva        | m0 | n2a | t3  | 43.0  | g2 | complete<br>remission/response                       | yes | 0 | 713      |
| TCGA-CN-A6V6 | 59.0 | male   | stage<br>iva        | m0 | n2b | t2  | 33.0  | gx | complete<br>remission/response                       | yes | 0 | 635      |
| TCGA-CN-A6V7 | 40.0 | male   | stage<br>iva        | m0 | n2b | t2  | NA    | gx | complete<br>remission/response                       | yes | 0 | 594      |
| TCGA-CQ-5324 | 59.0 | male   | stage<br>iva        | m0 | n2a | t3  | 24.0  | g2 | complete<br>remission/response                       | no  | 0 | 159<br>3 |
| TCGA-CQ-5325 | 65.0 | male   | stage i             | m0 | n0  | t1  | 22.0  | g2 | complete<br>remission/response                       | no  | 1 | 654      |
| TCGA-CQ-5326 | 67.0 | male   | stage<br>iva        | m0 | n2b | t4a | 56.0  | g3 | progressive disease                                  | no  | 1 | 89       |
| TCGA-CQ-5327 | 61.0 | female | stage<br>iva        | m0 | n2c | t3  | 55.0  | g2 | complete<br>remission/response                       | yes | 0 | 166<br>0 |
| TCGA-CQ-5329 | 46.0 | female | stage iii           | m0 | n1  | t3  | 29.0  | g2 | complete<br>remission/response                       | no  | 0 | 214<br>3 |
| TCGA-CQ-5330 | 69.0 | female | stage iii           | m0 | n1  | t3  | 44.0  | g3 | complete<br>remission/response                       | yes | 0 | 189<br>7 |
| TCGA-CQ-5331 | 73.0 | female | stage<br>iva        | m0 | n0  | t4a | NA    | g2 | complete<br>remission/response                       | no  | 0 | 139<br>9 |
| TCGA-CQ-5332 | 87.0 | male   | stage iii           | m0 | n0  | t3  | 31.0  | g2 | NA                                                   | NA  | 1 | 317      |

|              |      |        |           |    |     |     |      |    |                             |     |   |      |
|--------------|------|--------|-----------|----|-----|-----|------|----|-----------------------------|-----|---|------|
| TCGA-CQ-5333 | 74.0 | male   | stage i   | m0 | n0  | t1  | 21.0 | g3 | complete remission/response | no  | 1 | 341  |
| TCGA-CQ-5334 | 87.0 | male   | stage ivb | m0 | n2b | t4b | 46.0 | g2 | progressive disease         | no  | 1 | 129  |
| TCGA-CQ-6218 | 52.0 | female | stage iii | m0 | n0  | t3  | 15.0 | g2 | complete remission/response | yes | 0 | 1253 |
| TCGA-CQ-6219 | 50.0 | female | stage iva | m0 | n2b | t3  | 55.0 | g2 | complete remission/response | no  | 1 | 479  |
| TCGA-CQ-6220 | 69.0 | male   | stage iii | m0 | n1  | t2  | 42.0 | g2 | complete remission/response | no  | 1 | 985  |
| TCGA-CQ-6222 | 63.0 | male   | stage iva | m0 | n2b | t3  | 66.0 | g2 | complete remission/response | yes | 0 | 2016 |
| TCGA-CQ-6223 | 69.0 | male   | stage iva | m0 | n0  | t4a | 32.0 | g2 | complete remission/response | no  | 0 | 1428 |
| TCGA-CQ-6224 | 52.0 | male   | stage ii  | m0 | n0  | t2  | 29.0 | g3 | complete remission/response | yes | 0 | 1721 |
| TCGA-CQ-6225 | 65.0 | male   | stage ii  | m0 | n0  | t2  | 25.0 | g2 | persistent disease          | no  | 1 | 403  |
| TCGA-CQ-6227 | 77.0 | male   | stage iii | m0 | n1  | t3  | 59.0 | g2 | progressive disease         | no  | 1 | 129  |
| TCGA-CQ-6228 | 71.0 | female | stage iii | m0 | n1  | t2  | 76.0 | g2 | complete remission/response | no  | 1 | 456  |
| TCGA-CQ-6229 | 61.0 | male   | stage iii | m0 | n1  | t2  | 21.0 | g2 | complete remission/response | no  | 0 | 1179 |
| TCGA-CQ-7065 | 40.0 | male   | stage ii  | m0 | n0  | t2  | 39.0 | g2 | complete remission/response | no  | 0 | 1628 |
| TCGA-CQ-7069 | 77.0 | female | stage ii  | m0 | n0  | t2  | 28.0 | g2 | complete remission/response | no  | 0 | 1274 |

|              |      |        |              |    |     |     |      |    |                                |     |   |          |
|--------------|------|--------|--------------|----|-----|-----|------|----|--------------------------------|-----|---|----------|
| TCGA-CQ-7071 | 76.0 | female | stage<br>iva | m0 | n1  | t4a | 22.0 | g2 | complete<br>remission/response | no  | 0 | 131<br>1 |
| TCGA-CQ-7072 | 51.0 | male   | stage<br>iva | m0 | n0  | t4a | 28.0 | g3 | complete<br>remission/response | no  | 0 | 235<br>9 |
| TCGA-CQ-A4C6 | 63.0 | male   | stage ii     | m0 | n0  | t2  | 23.0 | g2 | complete<br>remission/response | no  | 0 | 135<br>3 |
| TCGA-CQ-A4C9 | 56.0 | male   | NA           | mx | nx  | tx  | 47.0 | g2 | complete<br>remission/response | no  | 0 | 707      |
| TCGA-CQ-A4CA | NA   | male   | stage ii     | m0 | n0  | t2  | 25.0 | g2 | complete<br>remission/response | NA  | 0 |          |
| TCGA-CQ-A4CB | 59.0 | male   | stage ii     | m0 | n0  | t2  | 26.0 | g2 | complete<br>remission/response | no  | 0 | 893      |
| TCGA-CQ-A4CD | 69.0 | male   | stage<br>ivb | m0 | n0  | t4b | 47.0 | g3 | complete<br>remission/response | no  | 0 | 102<br>2 |
| TCGA-CQ-A4CE | 76.0 | female | stage ii     | m0 | n0  | t2  | 37.0 | g2 | complete<br>remission/response | no  | 0 | 897      |
| TCGA-CQ-A4CG | 78.0 | female | stage ii     | m0 | n0  | t2  | 16.0 | g2 | complete<br>remission/response | no  | 1 | 430      |
| TCGA-CQ-A4CH | 58.0 | male   | stage<br>iva | m0 | n2c | t4a | 55.0 | g2 | complete<br>remission/response | yes | 1 | 379      |
| TCGA-CQ-A4CI | 73.0 | male   | NA           | mx | nx  | tx  | 49.0 | g3 | complete<br>remission/response | no  | 0 | 950      |
| TCGA-CR-5243 | 51.0 | male   | stage<br>iva | m0 | n2b | t3  | NA   | g3 | complete<br>remission/response | yes | 0 | 256<br>2 |
| TCGA-CR-5247 | 48.0 | male   | stage iii    | m0 | n1  | t3  | NA   | g2 | complete<br>remission/response | yes | 0 | 358      |

|              |      |        |              |    |     |     |      |    |                                |     |   |          |
|--------------|------|--------|--------------|----|-----|-----|------|----|--------------------------------|-----|---|----------|
| TCGA-CR-5248 | 53.0 | male   | stage<br>iva | m0 | n2c | t4a | NA   | g3 | complete<br>remission/response | yes | 0 | 166<br>3 |
| TCGA-CR-5249 | 35.0 | female | stage ii     | m0 | n0  | t2  | NA   | gx | complete<br>remission/response | yes | 0 | 115<br>2 |
| TCGA-CR-5250 | 71.0 | male   | stage ii     | m0 | n0  | t2  | NA   | g3 | complete<br>remission/response | yes | 0 | 799      |
| TCGA-CR-6467 | 59.0 | male   | stage<br>iva | m0 | n2b | t2  | 41.0 | g3 | complete<br>remission/response | no  | 0 | 177<br>7 |
| TCGA-CR-6470 | 38.0 | male   | stage<br>iva | m0 | n2c | t1  | 24.0 | g2 | complete<br>remission/response | yes | 0 | 152<br>1 |
| TCGA-CR-6471 | 58.0 | male   | stage<br>iva | m0 | n0  | t4a | 18.0 | g2 | complete<br>remission/response | no  | 1 | 120<br>2 |
| TCGA-CR-6473 | 68.0 | male   | stage<br>iva | m0 | n2b | t3  | NA   | g3 | complete<br>remission/response | yes | 0 | 112<br>5 |
| TCGA-CR-6474 | 51.0 | male   | stage<br>iva | m0 | n2a | t3  | 31.0 | g2 | complete<br>remission/response | no  | 1 | 564      |
| TCGA-CR-6477 | 56.0 | female | stage<br>iva | m0 | n2b | t3  | NA   | g2 | complete<br>remission/response | NA  | 0 | 514      |
| TCGA-CR-6480 | 53.0 | male   | stage<br>iva | m0 | n2a | t2  | NA   | g2 | complete<br>remission/response | NA  | 0 | 362      |
| TCGA-CR-6481 | 47.0 | male   | stage<br>iva | m0 | n2a | t2  | NA   | g2 | complete<br>remission/response | NA  | 0 | 311      |
| TCGA-CR-6482 | 62.0 | male   | stage<br>iva | m0 | n2b | t2  | NA   | g3 | complete<br>remission/response | NA  | 0 | 345      |
| TCGA-CR-6484 | 67.0 | female | stage<br>iva | m0 | n0  | t4a | 22.0 | g2 | complete<br>remission/response | yes | 0 | 354      |

|              |      |        |           |    |     |     |       |    |                             |     |   |          |
|--------------|------|--------|-----------|----|-----|-----|-------|----|-----------------------------|-----|---|----------|
| TCGA-CR-6487 | 50.0 | male   | stage ii  | m0 | n0  | t2  | NA    | g3 | complete remission/response | no  | 0 | 234      |
| TCGA-CR-6488 | 68.0 | female | stage ii  | m0 | n0  | t2  | 22.0  | g2 | complete remission/response | no  | 0 | 379      |
| TCGA-CR-6491 | 60.0 | male   | stage iva | m0 | nx  | t4a | 49.0  | g2 | complete remission/response | yes | 0 | 693      |
| TCGA-CR-6492 | 78.0 | male   | stage iva | m0 | n1  | t4a | 37.0  | g3 | complete remission/response | no  | 0 | 479      |
| TCGA-CR-6493 | 69.0 | male   | stage iva | m0 | n2b | t3  | 16.0  | g2 | complete remission/response | yes | 1 | 282      |
| TCGA-CR-7364 | 66.0 | male   | stage iii | m0 | n0  | t3  | 36.0  | g2 | complete remission/response | no  | 0 | 143<br>5 |
| TCGA-CR-7365 | 60.0 | male   | stage iva | m0 | n2b | t4a | 45.0  | g2 | complete remission/response | yes | 0 | 119<br>1 |
| TCGA-CR-7367 | 52.0 | male   | stage ivb | m0 | n3  | t4a | 30.0  | g1 | complete remission/response | yes | 0 | 144<br>0 |
| TCGA-CR-7368 | 54.0 | male   | stage iva | m0 | n0  | t4a | 41.0  | g2 | complete remission/response | yes | 0 | 124<br>5 |
| TCGA-CR-7369 | 59.0 | male   | stage iva | m0 | n0  | t4a | 23.0  | g2 | complete remission/response | no  | 1 | 109<br>0 |
| TCGA-CR-7370 | 72.0 | female | stage ii  | m0 | n0  | t2  | NA    | g2 | complete remission/response | no  | 0 | 105      |
| TCGA-CR-7371 | 45.0 | female | stage iii | m0 | n0  | t3  | 104.0 | g2 | NA                          | no  | 1 | 94       |
| TCGA-CR-7372 | 45.0 | male   | stage ii  | m0 | n0  | t2  | 19.0  | g1 | complete remission/response | no  | 0 | 759      |
| TCGA-CR-7373 | 66.0 | male   | stage     | m0 | n2b | t4a | 19.0  | g2 | complete                    | yes | 0 | 889      |

|              |      |        |                 |    |     |     |      |    |                                |     |   |          |
|--------------|------|--------|-----------------|----|-----|-----|------|----|--------------------------------|-----|---|----------|
| TCGA-CR-7374 | 67.0 | female | iva<br>stage ii | m0 | n0  | t2  | NA   | g2 | remission/response<br>NA       | yes | 0 | 30       |
| TCGA-CR-7376 | 83.0 | male   | stage ii        | m0 | n0  | t2  | 22.0 | g2 | complete<br>remission/response | no  | 0 | 972      |
| TCGA-CR-7377 | 58.0 | male   | stage<br>iva    | m0 | n1  | t4a | 29.0 | g3 | complete<br>remission/response | no  | 1 | 279      |
| TCGA-CR-7379 | 78.0 | female | stage<br>iva    | m0 | n2b | t4a | 33.0 | g2 | complete<br>remission/response | no  | 0 | 103<br>6 |
| TCGA-CR-7380 | 58.0 | male   | stage iii       | m0 | n0  | t3  | 17.0 | g2 | complete<br>remission/response | yes | 1 | 606      |
| TCGA-CR-7382 | 49.0 | male   | stage<br>iva    | m0 | n2c | t2  | 83.0 | g2 | complete<br>remission/response | yes | 0 | 796      |
| TCGA-CR-7383 | 79.0 | female | stage i         | m0 | n0  | t1  | 21.0 | g2 | complete<br>remission/response | no  | 1 | 521      |
| TCGA-CR-7385 | 42.0 | male   | stage<br>iva    | m0 | n2b | t2  | NA   | g2 | complete<br>remission/response | yes | 0 | 997      |
| TCGA-CR-7386 | 69.0 | male   | stage<br>iva    | m0 | n1  | t4a | 47.0 | g1 | complete<br>remission/response | yes | 0 | 143<br>0 |
| TCGA-CR-7388 | 70.0 | female | stage<br>iva    | m0 | n2  | t2  | NA   | g2 | complete<br>remission/response | yes | 1 | 823      |
| TCGA-CR-7389 | 55.0 | male   | stage iii       | m0 | n1  | t2  | NA   | g2 | complete<br>remission/response | yes | 0 | 392      |
| TCGA-CR-7390 | 67.0 | male   | stage iii       | m0 | n0  | t3  | 16.0 | g2 | complete<br>remission/response | no  | 0 | 150<br>8 |
| TCGA-CR-7391 | 36.0 | female | stage i         | m0 | n0  | t1  | 10.0 | g1 | complete<br>remission/response | no  | 0 | 913      |

|              |      |        |              |    |     |     |      |    |                                |     |   |          |
|--------------|------|--------|--------------|----|-----|-----|------|----|--------------------------------|-----|---|----------|
| TCGA-CR-7392 | 67.0 | female | stage<br>iva | m0 | n2b | t3  | 36.0 | g1 | complete<br>remission/response | no  | 0 | 142<br>5 |
| TCGA-CR-7393 | 26.0 | male   | stage i      | m0 | n0  | t1  | 44.0 | g2 | complete<br>remission/response | yes | 0 | 993      |
| TCGA-CR-7394 | 70.0 | male   | stage<br>iva | m0 | n2c | t3  | 57.0 | g2 | complete<br>remission/response | no  | 0 | 134<br>6 |
| TCGA-CR-7395 | 80.0 | female | stage ii     | m0 | n0  | t2  | NA   | g2 | complete<br>remission/response | no  | 0 | 930      |
| TCGA-CR-7397 | 44.0 | male   | stage<br>iva | m0 | n2b | t3  | 34.0 | g2 | complete<br>remission/response | yes | 0 | 754      |
| TCGA-CR-7398 | 53.0 | female | stage ii     | m0 | n0  | t2  | 23.0 | g2 | complete<br>remission/response | no  | 0 | 156      |
| TCGA-CR-7399 | 60.0 | female | stage<br>iva | m0 | n2c | t4a | 57.0 | g3 | complete<br>remission/response | yes | 0 | 181      |
| TCGA-CR-7401 | 64.0 | male   | stage i      | m0 | n0  | t1  | 27.0 | g2 | complete<br>remission/response | no  | 0 | 107<br>7 |
| TCGA-CR-7402 | 68.0 | male   | stage iii    | m0 | n0  | t3  | NA   | g2 | complete<br>remission/response | yes | 0 | 911      |
| TCGA-CR-7404 | 53.0 | male   | stage<br>iva | m0 | n2b | t3  | NA   | g2 | complete<br>remission/response | yes | 0 | 147<br>2 |
| TCGA-CV-5430 | 61.0 | male   | stage<br>iva | m0 | n2b | t4a | 9.0  | g3 | complete<br>remission/response | no  | 0 | 424<br>1 |
| TCGA-CV-5431 | 73.0 | male   | stage<br>iva | m0 | n2  | t3  | 29.0 | g3 | complete<br>remission/response | no  | 1 | 522      |
| TCGA-CV-5432 | 68.0 | male   | stage iii    | m0 | n0  | t3  | 65.0 | g3 | NA                             | no  | 0 | 393<br>0 |

|              |      |        |              |    |     |     |      |    |                                |     |   |          |
|--------------|------|--------|--------------|----|-----|-----|------|----|--------------------------------|-----|---|----------|
| TCGA-CV-5434 | 60.0 | male   | stage<br>iva | m0 | n1  | t4a | 30.0 | g2 | complete<br>remission/response | no  | 1 | 331<br>4 |
| TCGA-CV-5435 | 57.0 | male   | stage<br>iva | m0 | n0  | t4a | 66.0 | g3 | NA                             | yes | 1 | 231<br>9 |
| TCGA-CV-5436 | 65.0 | male   | stage<br>iva | m0 | n2b | t3  | 51.0 | g2 | persistent disease             | no  | 1 | 584      |
| TCGA-CV-5439 | 62.0 | male   | stage ii     | m0 | n0  | t2  | 33.0 | g2 | NA                             | no  | 1 | 546      |
| TCGA-CV-5440 | 52.0 | male   | stage<br>iva | m0 | n2b | t4a | 47.0 | g3 | complete<br>remission/response | no  | 0 | 327<br>0 |
| TCGA-CV-5441 | 58.0 | male   | stage<br>iva | m0 | n1  | t4a | 62.0 | g3 | complete<br>remission/response | no  | 0 | 288<br>6 |
| TCGA-CV-5442 | 76.0 | female | stage<br>iva | m0 | n2b | t4a | 33.0 | g3 | complete<br>remission/response | no  | 0 | 232<br>7 |
| TCGA-CV-5443 | 63.0 | male   | stage iii    | m0 | n1  | t3  | 11.0 | g3 | NA                             | no  | 0 | 278<br>4 |
| TCGA-CV-5444 | 64.0 | male   | stage<br>iva | m0 | n0  | t4a | 21.0 | g3 | NA                             | no  | 0 | 243<br>7 |
| TCGA-CV-5966 | 63.0 | female | stage<br>iva | m0 | n1  | t4a | 23.0 | g3 | complete<br>remission/response | no  | 1 | 545      |
| TCGA-CV-5970 | 59.0 | male   | stage<br>iva | m0 | n2b | t4a | 50.0 | g2 | NA                             | NA  | 1 | 406      |
| TCGA-CV-5971 | 60.0 | male   | stage<br>iva | m0 | n2b | t2  | 26.0 | g2 | NA                             | no  | 0 | 701      |
| TCGA-CV-5973 | 62.0 | female | stage iii    | m0 | n0  | t3  | 58.0 | g3 | complete<br>remission/response | no  | 0 | 264<br>1 |
| TCGA-CV-5976 | 50.0 | male   | stage iii    | m0 | n1  | t3  | 50.0 | g2 | NA                             | NA  | 0 | 147      |



|              |      |        |           |    |     |     |      |    |                             |     |   |               |
|--------------|------|--------|-----------|----|-----|-----|------|----|-----------------------------|-----|---|---------------|
| TCGA-CV-5977 | 66.0 | male   | stage iii | m0 | n1  | t3  | 82.0 | g2 | complete remission/response | no  | 0 | 8<br>184<br>0 |
| TCGA-CV-5978 | 53.0 | female | stage ivb | m0 | n3  | t4a | 55.0 | g2 | NA                          | NA  | 1 | 215           |
| TCGA-CV-5979 | 26.0 | male   | stage iii | m0 | n1  | t3  | 55.0 | g2 | complete remission/response | no  | 0 | 131<br>5      |
| TCGA-CV-6003 | 50.0 | female | stage ii  | m0 | n0  | t2  | 23.0 | g2 | NA                          | no  | 0 | 166<br>5      |
| TCGA-CV-6433 | 57.0 | male   | stage ii  | m0 | n0  | t2  | 5.0  | g3 | complete remission/response | yes | 0 | 641           |
| TCGA-CV-6436 | 62.0 | male   | stage iii | m0 | n0  | t3  | 40.0 | g1 | NA                          | no  | 0 | 189<br>9      |
| TCGA-CV-6441 | 60.0 | male   | stage iii | m0 | n0  | t3  | 44.0 | g3 | progressive disease         | no  | 1 | 292           |
| TCGA-CV-6933 | 53.0 | male   | stage iva | m0 | n0  | t4a | 32.0 | g2 | NA                          | no  | 1 | 274<br>1      |
| TCGA-CV-6934 | 66.0 | female | stage iva | m0 | n2b | t3  | 19.0 | g2 | complete remission/response | no  | 1 | 65            |
| TCGA-CV-6935 | 67.0 | male   | stage iii | m0 | n0  | t3  | 4.0  | g3 | NA                          | NA  | 1 | 295           |
| TCGA-CV-6936 | 68.0 | male   | stage iva | m0 | n2b | t4a | 10.0 | g2 | progressive disease         | no  | 1 | 166           |
| TCGA-CV-6937 | 71.0 | male   | stage ii  | m0 | n0  | t2  | NA   | g2 | NA                          | NA  | 1 | 624           |
| TCGA-CV-6938 | 87.0 | male   | stage ii  | m0 | n0  | t2  | NA   | g1 | NA                          | NA  | 1 | 144           |
| TCGA-CV-6939 | 60.0 | male   | stage iva | m0 | n1  | t4a | 12.0 | g3 | NA                          | NA  | 1 | 666           |
| TCGA-CV-6940 | 80.0 | female | stage i   | m0 | n0  | t1  | 12.0 | g2 | complete                    | no  | 1 | 804           |

|              |      |        |              |    |     |     |      |    |                                |    |   |          |
|--------------|------|--------|--------------|----|-----|-----|------|----|--------------------------------|----|---|----------|
| TCGA-CV-6941 | 51.0 | male   | stage iii    | m0 | n0  | t3  | 29.0 | g2 | remission/response<br>complete | no | 1 | 342      |
| TCGA-CV-6942 | 73.0 | female | stage ii     | m0 | n0  | t2  | NA   | g3 | remission/response<br>complete | no | 0 | 428      |
| TCGA-CV-6943 | 74.0 | male   | stage iii    | m0 | n0  | t3  | NA   | g2 | remission/response<br>NA       | NA | 1 | 602      |
| TCGA-CV-6945 | 41.0 | male   | stage<br>iva | m0 | n2b | t4a | 45.0 | g2 | remission/response<br>NA       | NA | 1 | 366      |
| TCGA-CV-6948 | 79.0 | female | stage<br>iva | m0 | n0  | t4a | 44.0 | g2 | remission/response<br>NA       | no | 1 | 128<br>9 |
| TCGA-CV-6950 | 64.0 | male   | stage<br>iva | m0 | n2c | t3  | 45.0 | g2 | remission/response<br>complete | no | 1 | 459      |
| TCGA-CV-6951 | 57.0 | male   | stage<br>iva | m0 | n2c | t4a | 29.0 | g2 | remission/response<br>NA       | NA | 1 | 915      |
| TCGA-CV-6952 | 65.0 | female | stage iii    | m0 | n0  | t3  | 9.0  | g1 | remission/response<br>NA       | no | 1 | 185      |
| TCGA-CV-6953 | 80.0 | female | stage iii    | m0 | n0  | t3  | 33.0 | g1 | remission/response<br>complete | no | 1 | 164<br>1 |
| TCGA-CV-6954 | 59.0 | male   | stage<br>iva | m0 | n1  | t4a | 22.0 | g2 | remission/response<br>complete | no | 1 | 200<br>2 |
| TCGA-CV-6955 | 74.0 | female | stage ii     | m0 | n0  | t2  | NA   | g3 | remission/response<br>NA       | NA | 1 | 334      |
| TCGA-CV-6956 | 67.0 | male   | stage<br>iva | m0 | n2c | t4a | 27.0 | g2 | remission/response<br>complete | no | 1 | 217      |
| TCGA-CV-6959 | 48.0 | male   | stage iii    | m0 | n1  | t3  | 28.0 | g2 | remission/response<br>NA       | no | 1 | 256      |
| TCGA-CV-6960 | 49.0 | male   | stage iii    | m0 | n0  | t3  | 22.0 | g3 | remission/response<br>NA       | no | 1 | 862      |
| TCGA-CV-6961 | 61.0 | male   | stage ii     | m0 | n0  | t2  | NA   | g3 | remission/response<br>complete | no | 1 | 76       |

|              |      |        |              |    |     |     |      |    |                                |    |   |          |
|--------------|------|--------|--------------|----|-----|-----|------|----|--------------------------------|----|---|----------|
| TCGA-CV-6962 | 65.0 | male   | stage iii    | m0 | n0  | t3  | NA   | g2 | NA                             | NA | 1 | 126      |
| TCGA-CV-7089 | 74.0 | male   | stage<br>iva | m0 | n2  | t4a | 22.0 | g2 | NA                             | NA | 1 | 197<br>2 |
| TCGA-CV-7090 | 39.0 | male   | stage ii     | m0 | n0  | t2  | NA   | g2 | complete<br>remission/response | no | 0 | 525<br>2 |
| TCGA-CV-7091 | 54.0 | male   | stage i      | m0 | n0  | t1  | 25.0 | g3 | NA                             | NA | 0 | 338<br>1 |
| TCGA-CV-7095 | 87.0 | female | stage<br>iva | m0 | n2a | t1  | 8.0  | g2 | NA                             | no | 1 | 572      |
| TCGA-CV-7097 | 53.0 | male   | stage iii    | m0 | n0  | t3  | NA   | g3 | NA                             | NA | 1 | 385      |
| TCGA-CV-7099 | 85.0 | female | stage ii     | m0 | n0  | t2  | NA   | g2 | complete<br>remission/response | no | 1 | 243      |
| TCGA-CV-7100 | 66.0 | male   | stage ii     | m0 | n0  | t2  | NA   | g3 | NA                             | NA | 1 | 274      |
| TCGA-CV-7101 | 80.0 | male   | stage ii     | m0 | n0  | t2  | 0.0  | g2 | NA                             | NA | 1 | 160      |
| TCGA-CV-7102 | 76.0 | female | stage iii    | m0 | n1  | t3  | 24.0 | g3 | complete<br>remission/response | no | 1 | 56       |
| TCGA-CV-7103 | 49.0 | male   | stage ii     | m0 | n0  | t2  | 14.0 | g2 | NA                             | NA | 1 | 159<br>1 |
| TCGA-CV-7104 | 61.0 | female | stage<br>iva | m0 | n2  | t2  | 30.0 | g2 | complete<br>remission/response | no | 1 | 393      |
| TCGA-CV-7177 | 82.0 | female | stage i      | m0 | n0  | t1  | NA   | g2 | NA                             | NA | 1 | 663      |
| TCGA-CV-7178 | 64.0 | female | stage<br>iva | m0 | n1  | t4a | 21.0 | g3 | NA                             | NA | 1 | 216<br>6 |
| TCGA-CV-7180 | 34.0 | male   | stage ii     | m0 | n0  | t2  | 17.0 | g2 | NA                             | NA | 1 | 327      |
| TCGA-CV-7183 | 53.0 | male   | stage ii     | m0 | n0  | t2  | 36.0 | g1 | complete<br>remission/response | no | 0 | 398<br>1 |

|              |      |        |              |    |     |     |      |    |                                |    |   |          |
|--------------|------|--------|--------------|----|-----|-----|------|----|--------------------------------|----|---|----------|
| TCGA-CV-7235 | 67.0 | male   | stage iii    | m0 | n0  | t3  | 64.0 | g3 | complete<br>remission/response | no | 0 | 234<br>7 |
| TCGA-CV-7236 | 77.0 | female | stage<br>iva | m0 | n2c | t2  | 34.0 | g3 | NA                             | NA | 1 | 144      |
| TCGA-CV-7238 | 69.0 | female | stage ii     | m0 | n0  | t2  | 73.0 | g2 | complete<br>remission/response | no | 0 | 272<br>7 |
| TCGA-CV-7242 | 60.0 | female | stage iii    | m0 | n0  | t3  | 43.0 | g2 | NA                             | NA | 0 | 109<br>5 |
| TCGA-CV-7245 | 62.0 | male   | stage iii    | m0 | n0  | t3  | 46.0 | g2 | NA                             | NA | 0 | 797      |
| TCGA-CV-7247 | 55.0 | male   | stage ii     | m0 | n0  | t2  | 9.0  | g2 | NA                             | NA | 1 | 577      |
| TCGA-CV-7248 | 63.0 | female | stage<br>iva | m0 | n2b | t4a | 24.0 | g2 | NA                             | NA | 1 | 521      |
| TCGA-CV-7250 | 64.0 | male   | stage iii    | m0 | n0  | t3  | 48.0 | g1 | complete<br>remission/response | no | 1 | 290<br>0 |
| TCGA-CV-7252 | 62.0 | female | stage iii    | m0 | n0  | t3  | 34.0 | g2 | progressive disease            | no | 1 | 151      |
| TCGA-CV-7253 | 58.0 | male   | stage ii     | m0 | n0  | t2  | NA   | g2 | partial<br>remission/response  | no | 1 | 361      |
| TCGA-CV-7254 | 55.0 | male   | stage ii     | m0 | n0  | t2  | 0.0  | g3 | NA                             | NA | 1 | 145<br>9 |
| TCGA-CV-7255 | 32.0 | female | stage ii     | m0 | n0  | t2  | NA   | g2 | complete<br>remission/response | no | 1 | 64       |
| TCGA-CV-7261 | 57.0 | male   | stage iii    | m0 | n0  | t3  | 17.0 | g2 | NA                             | no | 0 | 151<br>2 |
| TCGA-CV-7263 | 64.0 | male   | stage ii     | m0 | nx  | t2  | NA   | g1 | NA                             | NA | 1 | 560      |
| TCGA-CV-7406 | 49.0 | male   | stage ii     | m0 | n0  | t2  | 2.0  | gx | NA                             | NA | 1 | 174<br>8 |

|              |      |        |              |    |     |     |      |    |                                |    |   |          |
|--------------|------|--------|--------------|----|-----|-----|------|----|--------------------------------|----|---|----------|
| TCGA-CV-7407 | 67.0 | female | stage ii     | m0 | n0  | t2  | NA   | g2 | NA                             | NA | 1 | 108<br>1 |
| TCGA-CV-7410 | 61.0 | male   | stage ii     | m0 | n0  | t2  | 10.0 | gx | NA                             | NA | 1 | 641<br>7 |
| TCGA-CV-7411 | 64.0 | female | stage<br>iva | m0 | n0  | t4a | 29.0 | g1 | NA                             | NA | 1 | 271<br>7 |
| TCGA-CV-7413 | 74.0 | female | stage ii     | m0 | n0  | t2  | NA   | g2 | complete<br>remission/response | no | 1 | 294      |
| TCGA-CV-7414 | 78.0 | male   | stage iii    | m0 | n1  | t3  | 21.0 | g2 | complete<br>remission/response | no | 1 | 14       |
| TCGA-CV-7415 | 60.0 | male   | stage iii    | m0 | n0  | t3  | 82.0 | g2 | NA                             | NA | 1 | 695      |
| TCGA-CV-7416 | 29.0 | female | stage<br>iva | m0 | n0  | t4a | NA   | gx | NA                             | NA | 1 | 763      |
| TCGA-CV-7418 | 62.0 | male   | stage<br>iva | m0 | n0  | t4a | 28.0 | g2 | complete<br>remission/response | no | 1 | 789      |
| TCGA-CV-7421 | 76.0 | male   | stage<br>iva | m0 | n0  | t4a | 11.0 | g2 | NA                             | no | 1 | 2        |
| TCGA-CV-7422 | 60.0 | female | stage<br>iva | m0 | n1  | t4a | 27.0 | g3 | complete<br>remission/response | no | 1 | 103<br>7 |
| TCGA-CV-7423 | 65.0 | male   | stage ii     | m0 | n0  | t2  | NA   | g1 | NA                             | NA | 1 | 305<br>9 |
| TCGA-CV-7424 | 67.0 | male   | stage<br>iva | m0 | n2a | t4a | 4.0  | g2 | NA                             | NA | 1 | 453      |
| TCGA-CV-7425 | 77.0 | female | stage iii    | m0 | n0  | t3  | NA   | g1 | NA                             | NA | 1 | 171<br>8 |
| TCGA-CV-7427 | 73.0 | female | stage ii     | m0 | n0  | t2  | NA   | g1 | complete                       | no | 1 | 476      |

|              |      |        |              |    |     |     |      |    |                                |                    |   |          |
|--------------|------|--------|--------------|----|-----|-----|------|----|--------------------------------|--------------------|---|----------|
|              |      |        |              |    |     |     |      |    |                                | remission/response |   | 0        |
| TCGA-CV-7428 | 47.0 | male   | stage<br>iva | m0 | n2a | t4a | 10.0 | g2 | NA                             | NA                 | 1 | 167<br>1 |
| TCGA-CV-7429 | 55.0 | male   | stage iii    | m0 | n0  | t3  | 24.0 | g3 | partial<br>remission/response  | no                 | 1 | 107      |
| TCGA-CV-7430 | 56.0 | male   | stage iii    | m0 | n0  | t3  | 10.0 | g2 | NA                             | NA                 | 1 | 495      |
| TCGA-CV-7432 | 79.0 | male   | stage iii    | m0 | n1  | t2  | 20.0 | g1 | complete<br>remission/response | no                 | 1 | 257<br>0 |
| TCGA-CV-7433 | 49.0 | male   | stage<br>iva | m0 | n1  | t4a | 43.0 | g3 | progressive disease            | yes                | 1 | 601      |
| TCGA-CV-7434 | 64.0 | male   | stage iii    | m0 | n0  | t3  | 1.0  | g2 | complete<br>remission/response | no                 | 1 | 218      |
| TCGA-CV-7435 | 57.0 | female | stage<br>iva | m0 | n1  | t4a | 22.0 | g2 | complete<br>remission/response | no                 | 1 | 468<br>0 |
| TCGA-CV-7437 | 77.0 | male   | stage ii     | m0 | n0  | t2  | NA   | gx | NA                             | NA                 | 1 | 506      |
| TCGA-CV-7438 | 87.0 | female | stage ii     | m0 | n0  | t2  | NA   | g3 | NA                             | no                 | 1 | 194      |
| TCGA-CV-7440 | 38.0 | male   | stage ii     | m0 | n0  | t2  | NA   | gx | NA                             | NA                 | 1 | 675      |
| TCGA-CV-7446 | 66.0 | male   | stage ii     | m0 | n0  | t2  | 2.0  | g2 | NA                             | NA                 | 1 | 109<br>3 |
| TCGA-CV-7568 | 48.0 | female | stage<br>iva | m0 | n0  | t4a | NA   | gx | NA                             | NA                 | 1 | 927      |
| TCGA-CV-A45O | 57.0 | male   | stage iii    | m0 | n0  | t3  | 14.0 | g2 | NA                             | no                 | 0 | 851      |
| TCGA-CV-A45P | 82.0 | female | stage ii     | m0 | n0  | t2  | 22.0 | g2 | complete<br>remission/response | NA                 | 0 | 639      |
| TCGA-CV-A45Q | 69.0 | female | stage<br>ivc | m0 | n1  | t4a | 20.0 | g1 | complete<br>remission/response | no                 | 1 | 515<br>2 |

|              |      |        |           |    |     |     |      |    |                             |    |   |      |
|--------------|------|--------|-----------|----|-----|-----|------|----|-----------------------------|----|---|------|
| TCGA-CV-A45R | 46.0 | male   | stage iii | m0 | n1  | t3  | 26.0 | g1 | complete remission/response | no | 0 | 5480 |
| TCGA-CV-A45T | 64.0 | female | stage ii  | m0 | n0  | t2  | 32.0 | g3 | NA                          | no | 1 | 4856 |
| TCGA-CV-A45U | 59.0 | male   | stage iva | m0 | n0  | t4  | 13.0 | g1 | complete remission/response | no | 1 | 1079 |
| TCGA-CV-A45V | 87.0 | female | stage iva | m0 | n0  | t4  | NA   | g1 | NA                          | no | 1 | 32   |
| TCGA-CV-A45W | 75.0 | male   | stage iii | m0 | n0  | t3  | 48.0 | g2 | NA                          | no | 1 | 1398 |
| TCGA-CV-A45X | 47.0 | male   | stage iva | m0 | n1  | t4a | 32.0 | g2 | complete remission/response | no | 1 | 198  |
| TCGA-CV-A45Y | 61.0 | male   | stage iva | m0 | n0  | t4a | 15.0 | g3 | complete remission/response | no | 1 | 2703 |
| TCGA-CV-A45Z | 75.0 | male   | stage ii  | m0 | n0  | t2  | 10.0 | g3 | NA                          | no | 1 | 1466 |
| TCGA-CV-A460 | 72.0 | male   | stage iva | m0 | n2b | t3  | 80.0 | g3 | complete remission/response | no | 1 | 1838 |
| TCGA-CV-A461 | 65.0 | male   | stage iii | m0 | n0  | t3  | 21.0 | g2 | complete remission/response | no | 1 | 2064 |
| TCGA-CV-A463 | 82.0 | female | stage iva | m0 | n0  | t4a | 41.0 | g2 | complete remission/response | no | 1 | 23   |
| TCGA-CV-A464 | 48.0 | male   | stage iva | m0 | n0  | t4a | 37.0 | g2 | complete remission/response | NA | 0 | 1722 |
| TCGA-CV-A465 | 24.0 | male   | stage ii  | m0 | n0  | t2  | 53.0 | g1 | complete remission/response | no | 1 | 215  |

|              |      |        |           |    |     |     |      |    |                             |    |   |      |
|--------------|------|--------|-----------|----|-----|-----|------|----|-----------------------------|----|---|------|
| TCGA-CV-A468 | 42.0 | male   | stage iii | m0 | n2b | t3  | 34.0 | g2 | complete remission/response | no | 1 | 464  |
| TCGA-CV-A6JD | 82.0 | female | stage iva | m0 | n0  | t4a | 23.0 | g3 | complete remission/response | no | 1 | 182  |
| TCGA-CV-A6JE | 78.0 | male   | stage ii  | m0 | n0  | t2  | 34.0 | g2 | complete remission/response | no | 0 | 1075 |
| TCGA-CV-A6JM | 85.0 | male   | stage iva | m0 | n0  | t4a | 38.0 | g2 | complete remission/response | no | 1 | 194  |
| TCGA-CV-A6JN | 53.0 | male   | stage ii  | m0 | n0  | t2  | 27.0 | g1 | complete remission/response | no | 0 | 906  |
| TCGA-CV-A6JO | 69.0 | male   | stage iva | m0 | n2c | t4  | 51.0 | g2 | progressive disease         | NA | 1 | 197  |
| TCGA-CV-A6JT | 65.0 | male   | stage ii  | m0 | n0  | t2  | 34.0 | g2 | complete remission/response | no | 0 | 852  |
| TCGA-CV-A6JU | 61.0 | female | stage iva | m0 | n0  | t4a | 93.0 | g2 | complete remission/response | NA | 0 | 110  |
| TCGA-CV-A6JY | 69.0 | male   | stage iva | m0 | n0  | t4a | 27.0 | g1 | complete remission/response | NA | 0 | 646  |
| TCGA-CV-A6JZ | 68.0 | male   | stage iva | m0 | n0  | t4a | 66.0 | g2 | complete remission/response | no | 0 | 714  |
| TCGA-CV-A6K0 | 58.0 | male   | stage ii  | m0 | n0  | t2  | 20.0 | g3 | complete remission/response | NA | 0 | 606  |
| TCGA-CV-A6K1 | 65.0 | male   | stage iva | m0 | n0  | t4a | 44.0 | g2 | complete remission/response | no | 0 | 685  |
| TCGA-CV-A6K2 | 79.0 | male   | stage ii  | m0 | n0  | t2  | 49.0 | g1 | progressive disease         | NA | 1 | 317  |
| TCGA-CX-7085 | 77.0 | female | stage iii | m0 | n0  | t3  | 25.0 | g2 | complete                    | no | 0 | 321  |



|              |      |        |              |    |     |     |      |    |                                |     |   |          |
|--------------|------|--------|--------------|----|-----|-----|------|----|--------------------------------|-----|---|----------|
| TCGA-CX-7086 | 53.0 | male   | stage<br>iva | m0 | n2c | t4a | 64.0 | g2 | remission/response<br>complete | yes | 0 | 573      |
| TCGA-CX-A4AQ | 56.0 | male   | stage<br>iva | m0 | n2a | t1  | 41.0 | g3 | remission/response<br>complete | NA  | 0 | 155<br>5 |
| TCGA-D6-6515 | 82.0 | female | stage ii     | m0 | n0  | t2  | NA   | g3 | remission/response<br>complete | no  | 1 | 403      |
| TCGA-D6-6516 | 69.0 | male   | stage iii    | m0 | n1  | t1  | 8.0  | g2 | remission/response<br>complete | no  | 0 | 773      |
| TCGA-D6-6517 | 59.0 | male   | stage iii    | m0 | n0  | t3  | 3.0  | g2 | progressive disease            | yes | 0 | 292      |
| TCGA-D6-6823 | 50.0 | male   | stage iii    | m0 | n1  | t3  | 6.0  | g2 | remission/response<br>complete | no  | 0 | 701      |
| TCGA-D6-6824 | 61.0 | male   | stage<br>iva | m0 | n1  | t4a | 25.0 | g2 | remission/response<br>complete | no  | 0 | 77       |
| TCGA-D6-6825 | 73.0 | male   | stage iii    | m0 | n0  | t3  | 9.0  | g2 | remission/response<br>complete | no  | 0 | 491      |
| TCGA-D6-6826 | 64.0 | female | stage<br>iva | m0 | n2  | t4a | 5.0  | g2 | remission/response<br>complete | no  | 1 | 348      |
| TCGA-D6-6827 | 55.0 | female | stage iii    | m0 | n1  | t1  | 1.0  | g3 | remission/response<br>complete | no  | 0 | 568      |
| TCGA-D6-8568 | 62.0 | male   | stage ii     | m0 | n0  | t2  | 3.0  | g2 | stable disease                 | yes | 0 | 759      |
| TCGA-D6-8569 | 52.0 | male   | stage ii     | m0 | n0  | t2  | 7.0  | g2 | stable disease                 | no  | 0 | 770      |
| TCGA-D6-A4Z9 | 59.0 | male   | stage<br>iva | m0 | n2  | t2  | 10.0 | g2 | remission/response<br>complete | no  | 0 | 539      |
| TCGA-D6-A4ZB | 61.0 | male   | stage iii    | m0 | n0  | t3  | 15.0 | g2 | remission/response<br>complete | no  | 0 | 376      |

|              |      |        |              |    |     |     |      |    |                                |     |   |          |
|--------------|------|--------|--------------|----|-----|-----|------|----|--------------------------------|-----|---|----------|
| TCGA-D6-A6EK | 67.0 | male   | stage<br>iva | m0 | n1  | t4  | 3.0  | g1 | complete<br>remission/response | yes | 0 | 875      |
| TCGA-D6-A6EM | 65.0 | female | stage iii    | m0 | n1  | t2  | 17.0 | g2 | complete<br>remission/response | no  | 0 | 232      |
| TCGA-D6-A6EN | 71.0 | male   | stage iii    | m0 | n0  | t3  | 15.0 | g3 | complete<br>remission/response | no  | 0 | 687      |
| TCGA-D6-A6EO | 44.0 | male   | stage<br>iva | m0 | n0  | t4a | 9.0  | g2 | stable disease                 | no  | 0 | 759      |
| TCGA-D6-A6EP | 62.0 | male   | stage iii    | m0 | n0  | t3  | 4.0  | g3 | complete<br>remission/response | NA  | 0 | 424      |
| TCGA-D6-A6EQ | 57.0 | male   | stage<br>iva | m0 | n1  | t4a | 20.0 | g3 | complete<br>remission/response | NA  | 0 | 368      |
| TCGA-D6-A6ES | 50.0 | male   | stage<br>iva | m0 | n1  | t4a | 13.0 | g2 | complete<br>remission/response | no  | 0 | 389      |
| TCGA-D6-A74Q | 67.0 | male   | stage<br>iva | m0 | n0  | t4a | 7.0  | g3 | complete<br>remission/response | no  | 0 | 710      |
| TCGA-DQ-5624 | 43.0 | female | stage<br>iva | m0 | n1  | t4a | 24.0 | g2 | complete<br>remission/response | yes | 0 | 177<br>8 |
| TCGA-DQ-5625 | 52.0 | female | stage ii     | m0 | n0  | t2  | 19.0 | g2 | complete<br>remission/response | no  | 1 | 113<br>3 |
| TCGA-DQ-5630 | 73.0 | male   | stage iii    | m0 | n1  | t3  | 49.0 | g2 | complete<br>remission/response | no  | 0 | 103<br>0 |
| TCGA-DQ-5631 | 52.0 | male   | stage<br>iva | m0 | n2b | t3  | 20.0 | g3 | complete<br>remission/response | yes | 1 | 548      |
| TCGA-DQ-7591 | 62.0 | male   | stage<br>iva | m0 | n2b | t4a | NA   | g4 | complete<br>remission/response | yes | 0 | 622      |

|              |      |        |              |    |     |     |      |    |                                |     |   |          |
|--------------|------|--------|--------------|----|-----|-----|------|----|--------------------------------|-----|---|----------|
| TCGA-DQ-7592 | 57.0 | male   | stage<br>iva | m0 | n2b | t4a | 42.0 | g2 | complete<br>remission/response | yes | 0 | 114<br>3 |
| TCGA-F7-7848 | 47.0 | male   | stage<br>iva | m0 | n1  | t4a | 4.0  | g2 | complete<br>remission/response | no  | 0 | 113<br>1 |
| TCGA-F7-8298 | 58.0 | male   | stage i      | m0 | n0  | t1  | 14.0 | g1 | complete<br>remission/response | no  | 0 | 995      |
| TCGA-F7-8489 | 48.0 | male   | stage ii     | m0 | n0  | t2  | 8.0  | g1 | complete<br>remission/response | no  | 0 | 658      |
| TCGA-F7-A50G | 66.0 | male   | NA           | NA | NA  | NA  | 9.0  | g1 | complete<br>remission/response | no  | 0 | 616      |
| TCGA-F7-A50I | 72.0 | male   | NA           | NA | NA  | NA  | NA   | g2 | NA                             | NA  | 0 | 92       |
| TCGA-F7-A50J | 67.0 | female | NA           | NA | NA  | NA  | 10.0 | g2 | complete<br>remission/response | yes | 0 | 947      |
| TCGA-F7-A61S | 62.0 | male   | NA           | mx | nx  | tx  | 6.0  | g1 | complete<br>remission/response | no  | 0 | 576      |
| TCGA-F7-A61V | 54.0 | male   | NA           | mx | nx  | tx  | 62.0 | g1 | complete<br>remission/response | no  | 0 | 759      |
| TCGA-F7-A61W | 51.0 | male   | NA           | mx | nx  | tx  | 9.0  | g2 | NA                             | NA  | 0 | 14       |
| TCGA-F7-A620 | 47.0 | male   | NA           | mx | nx  | tx  | 12.0 | g1 | complete<br>remission/response | no  | 0 | 543      |
| TCGA-F7-A622 | 75.0 | male   | NA           | mx | nx  | tx  | NA   | g1 | complete<br>remission/response | no  | 1 | 359      |
| TCGA-F7-A623 | 70.0 | male   | NA           | mx | nx  | tx  | 6.0  | g1 | complete<br>remission/response | no  | 0 | 616      |
| TCGA-F7-A624 | 73.0 | male   | NA           | mx | nx  | tx  | NA   | g3 | complete<br>remission/response | no  | 0 | 378      |

|              |      |        |           |    |     |     |      |    |                             |     |   |          |
|--------------|------|--------|-----------|----|-----|-----|------|----|-----------------------------|-----|---|----------|
| TCGA-H7-7774 | 75.0 | female | stage iii | m0 | n0  | t3  | 21.0 | g2 | complete remission/response | no  | 0 | 407      |
| TCGA-H7-8501 | 54.0 | male   | stage iva | m0 | n2a | t4a | 43.0 | gx | complete remission/response | yes | 0 | 461      |
| TCGA-H7-8502 | 50.0 | male   | stage iva | m0 | n2b | t4a | 40.0 | g2 | complete remission/response | yes | 0 | 458      |
| TCGA-H7-A76A | 57.0 | male   | stage iva | m0 | n2b | t2  | 31.0 | g2 | complete remission/response | no  | 0 | 637      |
| TCGA-HD-7229 | 60.0 | male   | stage iva | m0 | nx  | t4a | NA   | g3 | progressive disease         | yes | 0 | 102<br>7 |
| TCGA-HD-7753 | 62.0 | male   | stage ii  | m0 | n0  | t2  | NA   | g2 | complete remission/response | yes | 0 | 866      |
| TCGA-HD-7754 | 69.0 | male   | stage iva | m0 | n2b | t2  | 23.0 | g1 | complete remission/response | NA  | 0 | 783      |
| TCGA-HD-7831 | 74.0 | male   | stage iii | m0 | n0  | t3  | 21.0 | g2 | complete remission/response | no  | 0 | 667      |
| TCGA-HD-7832 | 52.0 | male   | stage iva | m0 | n2  | t4a | 35.0 | g2 | complete remission/response | no  | 0 | 836      |
| TCGA-HD-8224 | 63.0 | male   | stage iii | m0 | n0  | t3  | 57.0 | g3 | progressive disease         | yes | 1 | 446      |
| TCGA-HD-8314 | 58.0 | male   | stage iii | m0 | n1  | t1  | 44.0 | g4 | complete remission/response | yes | 0 | 670      |
| TCGA-HD-A4C1 | 41.0 | female | stage iva | m0 | n2  | t3  | 42.0 | g1 | NA                          | NA  | 0 | 11       |
| TCGA-HD-A633 | 74.0 | male   | stage iva | m0 | n0  | t4  | 39.0 | g2 | complete remission/response | no  | 0 | 421      |
| TCGA-HD-A634 | 56.0 | male   | stage iii | m0 | n1  | t3  | 22.0 | g3 | NA                          | NA  | 1 | 130      |

|              |      |        |              |    |     |     |      |    |                                |     |   |          |
|--------------|------|--------|--------------|----|-----|-----|------|----|--------------------------------|-----|---|----------|
| TCGA-HD-A6HZ | 79.0 | female | stage ii     | m0 | n0  | t2  | 11.0 | g2 | NA                             | NA  | 0 | 111      |
| TCGA-HD-A6I0 | 56.0 | male   | stage iii    | m0 | nx  | t3  | 50.0 | g1 | complete<br>remission/response | no  | 0 | 210      |
| TCGA-HL-7533 | 65.0 | male   | stage<br>iva | m0 | n2b | t2  | NA   | g3 | complete<br>remission/response | yes | 0 | 105<br>7 |
| TCGA-IQ-7630 | 49.0 | male   | stage iii    | m0 | n0  | t3  | 27.0 | g3 | complete<br>remission/response | yes | 0 | 485      |
| TCGA-IQ-7631 | 60.0 | female | stage ii     | m0 | n0  | t2  | 48.0 | g1 | complete<br>remission/response | no  | 0 | 117<br>2 |
| TCGA-IQ-7632 | 68.0 | female | stage<br>iva | m0 | n0  | t4a | 30.0 | g1 | complete<br>remission/response | no  | 0 | 441      |
| TCGA-IQ-A61E | 55.0 | female | stage iii    | mx | n0  | t3  | 44.0 | g2 | complete<br>remission/response | yes | 0 | 114<br>7 |
| TCGA-IQ-A61G | 57.0 | male   | stage<br>iva | mx | n2c | t4a | 39.0 | g2 | progressive disease            | yes | 0 | 360      |
| TCGA-IQ-A61H | 76.0 | male   | stage ii     | mx | n0  | t2  | 53.0 | g2 | complete<br>remission/response | no  | 0 | 113<br>8 |
| TCGA-IQ-A61I | 63.0 | male   | stage<br>iva | m0 | n2a | t1  | 41.0 | g3 | complete<br>remission/response | NA  | 1 | 2        |
| TCGA-IQ-A61J | 54.0 | male   | stage<br>iva | m0 | n2b | t2  | 73.0 | g1 | complete<br>remission/response | yes | 0 | 102<br>1 |
| TCGA-IQ-A61O | 43.0 | male   | stage<br>iva | mx | n2b | t2  | 38.0 | gx | complete<br>remission/response | yes | 1 | 421      |
| TCGA-IQ-A6SH | 55.0 | male   | stage<br>ivc | m1 | n1  | t2  | 49.0 | g1 | complete<br>remission/response | no  | 0 | 471      |
| TCGA-KU-A66S | 69.0 | female | stage iii    | mx | n1  | t2  | 7.0  | g2 | complete                       | no  | 1 | 406      |

|              |      |        |              |    |     |     |      |    |                                |     |   |     |
|--------------|------|--------|--------------|----|-----|-----|------|----|--------------------------------|-----|---|-----|
| TCGA-KU-A66T | 53.0 | female | stage<br>iva | m0 | n0  | t4  | 24.0 | g2 | remission/response<br>complete | no  | 0 | 552 |
| TCGA-KU-A6H7 | 55.0 | female | stage<br>iva | m0 | n2a | t2  | 23.0 | g2 | remission/response<br>complete | yes | 0 | 586 |
| TCGA-KU-A6H8 | 41.0 | male   | stage i      | m0 | n0  | t1  | 16.0 | g3 | progressive disease            | yes | 1 | 327 |
| TCGA-MT-A51W | 52.0 | female | stage i      | m0 | nx  | t1  | NA   | g2 | remission/response<br>complete | no  | 0 | 437 |
| TCGA-MT-A51X | 30.0 | male   | stage<br>iva | m0 | n2b | t1  | 35.0 | g1 | NA                             | no  | 0 | 242 |
| TCGA-MT-A67A | 85.0 | female | stage i      | m0 | n0  | t1  | 20.0 | g2 | remission/response<br>complete | no  | 0 | 914 |
| TCGA-MT-A67D | 55.0 | male   | stage ii     | m0 | n0  | t2  | 23.0 | g2 | remission/response<br>complete | NA  | 0 | 56  |
| TCGA-MT-A67F | 60.0 | female | stage<br>iva | mx | n0  | t4  | 64.0 | g2 | stable disease                 | yes | 0 | 384 |
| TCGA-MT-A7BN | 74.0 | male   | stage<br>iva | m0 | n2b | t2  | 19.0 | g3 | progressive disease            | yes | 0 | 469 |
| TCGA-MZ-A5BI | 53.0 | male   | stage<br>iva | m0 | n2b | t2  | NA   | NA | remission/response<br>complete | NA  | 1 | 217 |
| TCGA-MZ-A6I9 | 68.0 | male   | stage<br>iva | m0 | n2b | t4a | NA   | g2 | NA                             | no  | 1 | 489 |
| TCGA-MZ-A7D7 | 51.0 | male   | stage<br>iva | m0 | n2b | t3  | 72.0 | NA | remission/response<br>complete | yes | 0 | 547 |
| TCGA-P3-A5Q5 | 54.0 | male   | stage<br>iva | m0 | n2  | tx  | NA   | g3 | remission/response<br>complete | NA  | 0 | 910 |

|              |      |        |           |    |     |    |      |    |                             |     |   |          |
|--------------|------|--------|-----------|----|-----|----|------|----|-----------------------------|-----|---|----------|
| TCGA-P3-A5Q6 | 49.0 | male   | stage iii | m0 | n0  | t3 | 35.0 | g3 | complete remission/response | yes | 1 | 480      |
| TCGA-P3-A5QA | 41.0 | male   | stage ii  | m0 | n0  | t2 | NA   | g3 | complete remission/response | no  | 0 | 218<br>2 |
| TCGA-P3-A5QE | 49.0 | male   | stage iii | m0 | n1  | t1 | 17.0 | g2 | complete remission/response | no  | 0 | 155<br>9 |
| TCGA-P3-A5QF | 49.0 | male   | stage iva | m0 | n2b | t4 | 41.0 | g2 | NA                          | NA  | 1 | 330      |
| TCGA-P3-A6SW | 50.0 | male   | stage iva | m0 | n2b | t4 | NA   | g3 | complete remission/response | NA  | 0 | 112<br>0 |
| TCGA-P3-A6SX | 67.0 | male   | stage iva | m0 | n0  | t4 | 30.0 | g2 | complete remission/response | NA  | 1 | 143<br>0 |
| TCGA-P3-A6T0 | 47.0 | female | stage iva | m0 | n2b | t4 | 18.0 | g2 | complete remission/response | NA  | 0 | 578      |
| TCGA-P3-A6T2 | 45.0 | male   | stage ii  | m0 | n0  | t2 | 42.0 | g2 | complete remission/response | yes | 0 | 229<br>8 |
| TCGA-P3-A6T3 | 49.0 | male   | stage iva | m0 | n1  | t4 | 30.0 | g2 | complete remission/response | NA  | 1 | 577      |
| TCGA-P3-A6T4 | 54.0 | male   | stage iva | m0 | n1  | t4 | 14.0 | g2 | progressive disease         | NA  | 1 | 62       |
| TCGA-P3-A6T5 | 79.0 | female | stage iva | m0 | n0  | t4 | 29.0 | g2 | complete remission/response | no  | 1 | 882      |
| TCGA-P3-A6T6 | 53.0 | male   | stage iva | m0 | n0  | t4 | NA   | g3 | complete remission/response | no  | 1 | 395      |
| TCGA-P3-A6T7 | 55.0 | male   | stage iii | m0 | n1  | t3 | 47.0 | g2 | complete remission/response | NA  | 1 | 487      |

|              |      |        |              |    |     |     |      |    |                                |     |   |     |
|--------------|------|--------|--------------|----|-----|-----|------|----|--------------------------------|-----|---|-----|
| TCGA-P3-A6T8 | 54.0 | male   | stage<br>iva | m0 | n0  | t4a | 34.0 | g3 | complete<br>remission/response | NA  | 0 | 400 |
| TCGA-QK-A64Z | 79.0 | female | stage ii     | m0 | n0  | t2  | NA   | g1 | progressive disease            | no  | 1 | 641 |
| TCGA-QK-A652 | 60.0 | male   | stage ii     | m0 | n0  | t2  | 39.0 | g2 | complete<br>remission/response | no  | 0 | 645 |
| TCGA-QK-A6IF | 61.0 | male   | stage<br>iva | m0 | n2b | t1  | NA   | gx | complete<br>remission/response | yes | 0 | 704 |
| TCGA-QK-A6IG | 69.0 | male   | stage ii     | m0 | n0  | t2  | 22.0 | g2 | progressive disease            | yes | 1 | 222 |
| TCGA-QK-A6IH | 65.0 | female | stage<br>iva | m0 | n1  | t4a | 32.0 | g2 | progressive disease            | yes | 0 | 653 |
| TCGA-QK-A6II | 52.0 | male   | stage iii    | m0 | n0  | t3  | 58.0 | g2 | progressive disease            | yes | 1 | 284 |
| TCGA-QK-A6IJ | 71.0 | male   | stage ii     | m0 | n0  | t2  | 40.0 | g3 | NA                             | no  | 0 | 387 |
| TCGA-QK-A6V9 | 56.0 | male   | stage ii     | m0 | n0  | t2  | NA   | g2 | complete<br>remission/response | no  | 0 | 833 |
| TCGA-QK-A6VB | 66.0 | male   | stage<br>iva | m0 | n0  | t4a | 40.0 | g2 | complete<br>remission/response | no  | 0 | 641 |
| TCGA-QK-A6VC | 62.0 | female | stage<br>iva | m0 | n2c | t4a | 67.0 | g2 | complete<br>remission/response | no  | 0 | 600 |
| TCGA-QK-A8Z7 | 59.0 | male   | stage<br>iva | m0 | n2c | t4a | 96.0 | NA | complete<br>remission/response | yes | 0 | 392 |
| TCGA-QK-A8Z8 | 60.0 | female | stage<br>ivc | m1 | n1  | t3  | NA   | g2 | NA                             | NA  | 1 | 171 |
| TCGA-QK-A8Z9 | 56.0 | male   | stage<br>iva | m0 | n2b | t4a | 82.0 | g2 | complete<br>remission/response | yes | 1 | 449 |
| TCGA-QK-A8ZA | 60.0 | male   | stage<br>iva | mx | n2b | t2  | NA   | g2 | complete<br>remission/response | yes | 1 | 371 |



|              |      |        |              |    |     |     |       |    |                                |     |   |     |
|--------------|------|--------|--------------|----|-----|-----|-------|----|--------------------------------|-----|---|-----|
| TCGA-QK-A8ZB | 68.0 | male   | stage<br>iva | m0 | n0  | t4a | 81.0  | g2 | complete<br>remission/response | no  | 0 | 542 |
| TCGA-QK-AA3J | 69.0 | male   | stage i      | m0 | n0  | t1  | NA    | g3 | complete<br>remission/response | no  | 0 | 466 |
| TCGA-QK-AA3K | 60.0 | male   | stage<br>iva | mx | n2b | t3  | 6.0   | g2 | NA                             | yes | 0 | 253 |
| TCGA-RS-A6TO | 82.0 | female | stage<br>iva | m0 | n2c | t4  | 61.0  | g2 | complete<br>remission/response | yes | 1 | 387 |
| TCGA-RS-A6TP | 58.0 | male   | stage ii     | m0 | n0  | t2  | NA    | g3 | complete<br>remission/response | no  | 0 | 516 |
| TCGA-T2-A6WX | 73.0 | female | stage iii    | m0 | n0  | t3  | 85.0  | g1 | progressive disease            | NA  | 1 | 209 |
| TCGA-T2-A6WZ | 53.0 | male   | stage<br>iva | m0 | n2b | t3  | 89.0  | g2 | stable disease                 | yes | 1 | 484 |
| TCGA-T2-A6X0 | 49.0 | male   | stage<br>iva | m0 | n2a | t1  | 31.0  | g2 | complete<br>remission/response | NA  | 0 | 216 |
| TCGA-T2-A6X2 | 82.0 | male   | stage iii    | m0 | n0  | t3  | 53.0  | g1 | complete<br>remission/response | NA  | 0 | 987 |
| TCGA-T3-A92M | 52.0 | male   | stage<br>iva | m0 | n2c | t4a | 4.0   | g2 | NA                             | yes | 0 | 417 |
| TCGA-T3-A92N | 79.0 | male   | stage<br>ivc | m1 | n1  | t1  | 31.0  | g3 | progressive disease            | no  | 1 | 95  |
| TCGA-TN-A7HI | 56.0 | male   | stage i      | m0 | n0  | t1  | 49.0  | g3 | complete<br>remission/response | no  | 0 | 412 |
| TCGA-TN-A7HJ | 51.0 | male   | stage iii    | m0 | nx  | t3  | 121.0 | g2 | complete<br>remission/response | yes | 0 | 403 |
| TCGA-TN-A7HL | 59.0 | male   | stage        | m0 | nx  | t4a | 71.0  | g2 | complete                       | yes | 0 | 619 |

|              |      |        |                     |    |     |     |      |    |                                |     |   |     |
|--------------|------|--------|---------------------|----|-----|-----|------|----|--------------------------------|-----|---|-----|
| TCGA-UF-A718 | 62.0 | male   | iva<br>stage<br>iva | m0 | n0  | t4a | 25.0 | g2 | remission/response<br>complete | NA  | 0 | 197 |
| TCGA-UF-A719 | 54.0 | male   | stage iii           | m0 | n0  | t3  | 13.0 | g1 | remission/response<br>complete | no  | 0 | 166 |
| TCGA-UF-A71A | 67.0 | male   | stage<br>iva        | m0 | n2a | t3  | 31.0 | g1 | remission/response<br>complete | NA  | 1 | 86  |
| TCGA-UF-A71B | 50.0 | male   | stage<br>iva        | m0 | n1  | t4a | 11.0 | g2 | remission/response<br>complete | no  | 0 | 150 |
| TCGA-UF-A71E | 63.0 | male   | stage<br>iva        | m0 | n0  | t4  | 48.0 | g3 | remission/response<br>complete | no  | 1 | 150 |
| TCGA-UF-A7J9 | 75.0 | male   | stage<br>iva        | m0 | n0  | t4a | 18.0 | g2 | remission/response<br>complete | no  | 0 | 135 |
| TCGA-UF-A7JA | 66.0 | female | stage<br>iva        | m0 | n1  | t4a | 14.0 | g2 | remission/response<br>complete | no  | 0 | 226 |
| TCGA-UF-A7JC | 42.0 | male   | stage iii           | m0 | n1  | t3  | 37.0 | g1 | remission/response<br>complete | yes | 1 | 546 |
| TCGA-UF-A7JD | 71.0 | male   | stage<br>iva        | m0 | n0  | t4a | 25.0 | g3 | remission/response<br>complete | no  | 1 | 739 |
| TCGA-UF-A7JF | 80.0 | male   | stage<br>iva        | m0 | n2b | t4a | 66.0 | g2 | remission/response<br>complete | yes | 0 | 168 |
| TCGA-UF-A7JH | 59.0 | male   | stage<br>iva        | m0 | n0  | t4a | 24.0 | g1 | remission/response<br>complete | no  | 0 | 896 |
| TCGA-UF-A7JJ | 68.0 | male   | stage<br>iva        | m0 | n0  | t4a | 27.0 | g1 | remission/response<br>complete | yes | 0 | 549 |
| TCGA-UF-A7JK | 59.0 | male   | stage               | m0 | n0  | t4a | 19.0 | g2 | complete                       | NA  | 1 | 424 |

|                  |      |        |                     |    |     |     |      |    |                                |    |   |     |
|------------------|------|--------|---------------------|----|-----|-----|------|----|--------------------------------|----|---|-----|
| TCGA-UF-A7JO     | 79.0 | female | iva<br>stage<br>iva | m0 | n0  | t4a | 27.0 | g2 | remission/response<br>complete | NA | 1 | 631 |
| TCGA-UF-A7JS     | 59.0 | male   | stage<br>iva        | m0 | n2b | t3  | 54.0 | g2 | remission/response<br>complete | no | 1 | 680 |
| TCGA-UF-A7JT     | 72.0 | female | stage<br>iva        | m0 | n0  | t4a | 13.0 | g3 | remission/response<br>complete | NA | 1 | 993 |
| TCGA-UP-A6W<br>W | 58.0 | male   | stage<br>iva        | mx | n2c | t2  | 53.0 | g2 | remission/response<br>complete | no | 0 | 518 |
| TCGA-WA-A7H4     | 69.0 | male   | stage ii            | m0 | n0  | t2  | NA   | g3 | remission/response<br>complete | no | 0 | 443 |

---
